# Supplementary material
Source: Research Square preprint supplement (doi:10.21203/rs.3.rs-8953685/v1)

Project: YC6314F ABX7470-9.SQD Contig 1

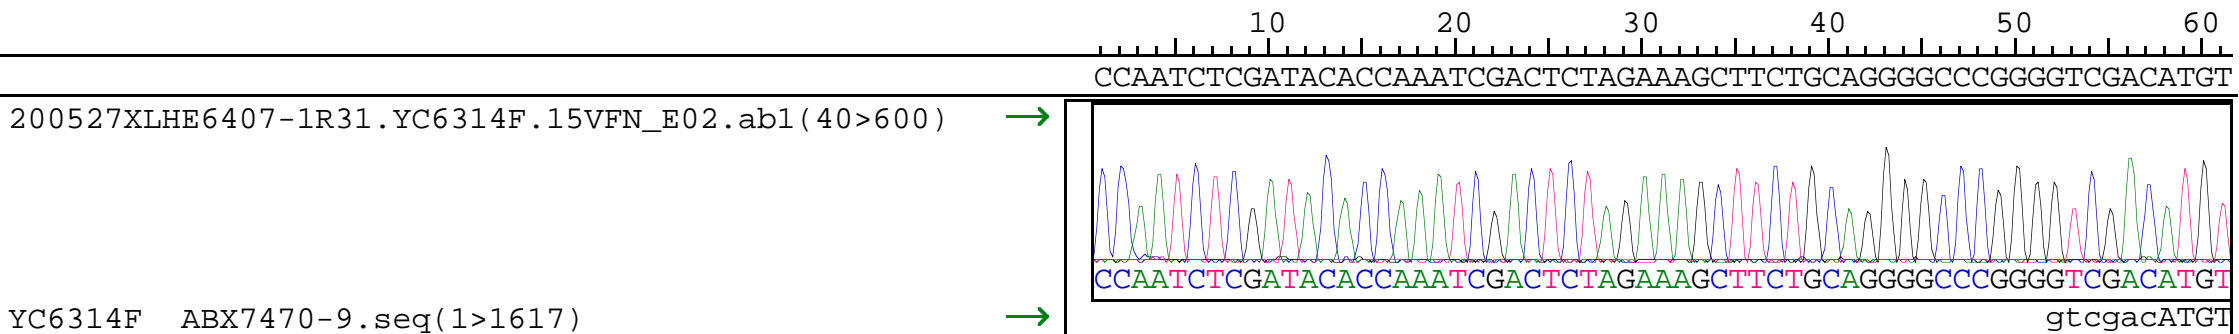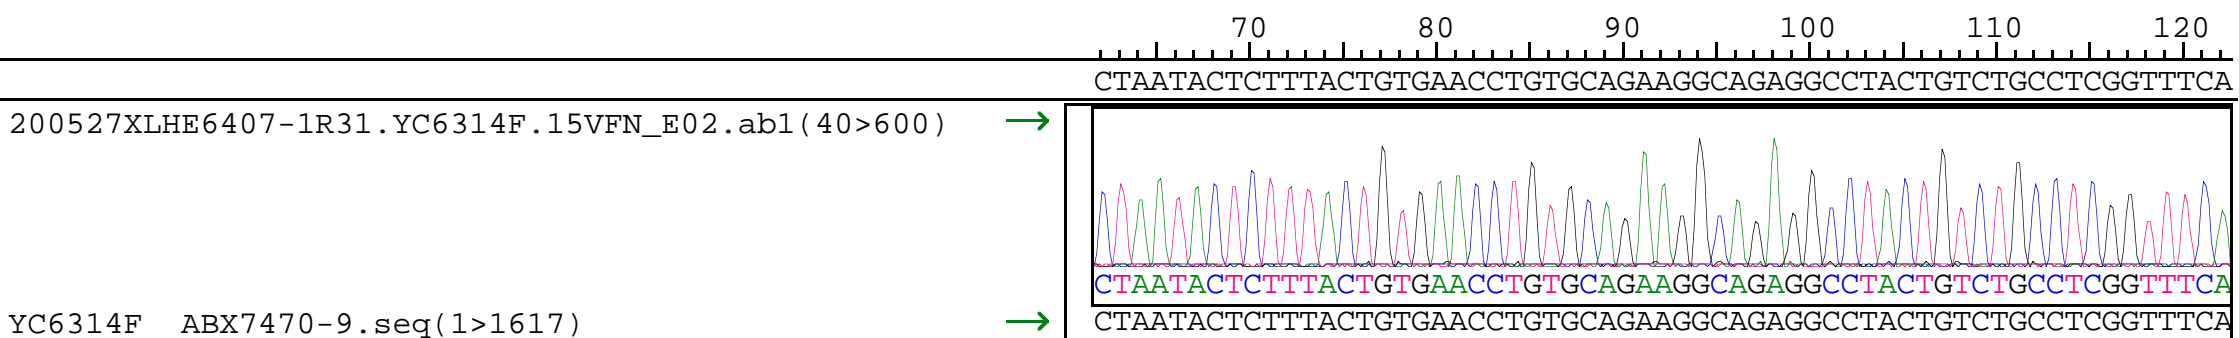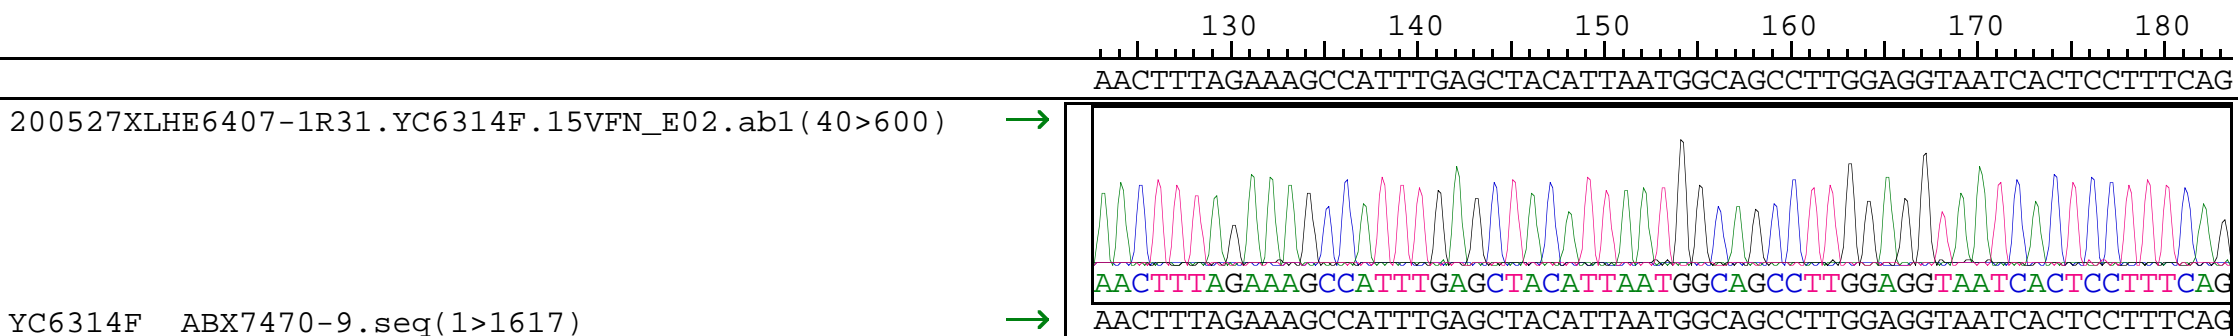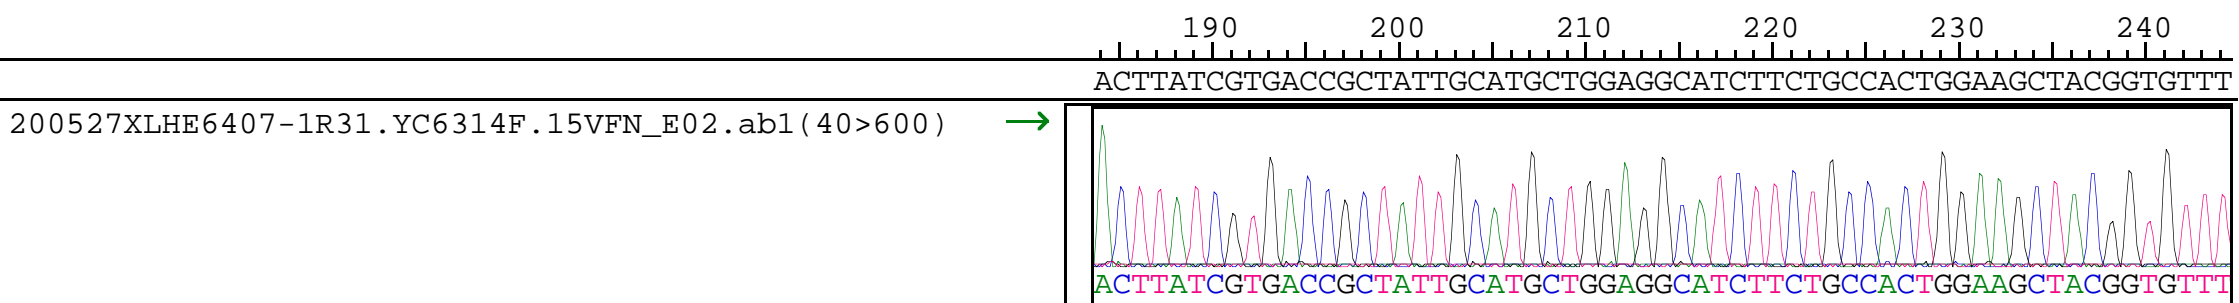

## Project: YC6314F ABX7470-9.SQD Contig 1

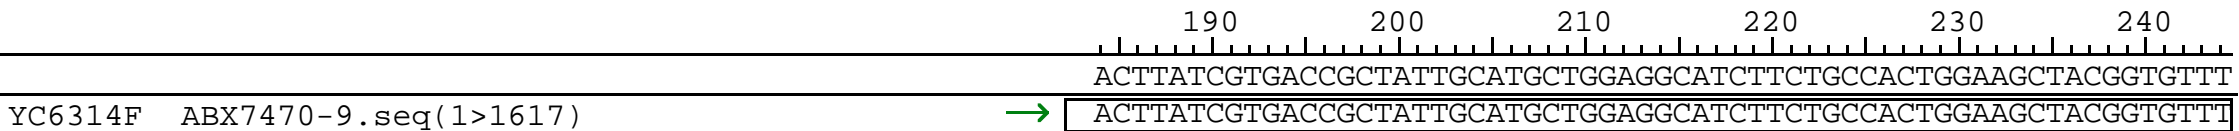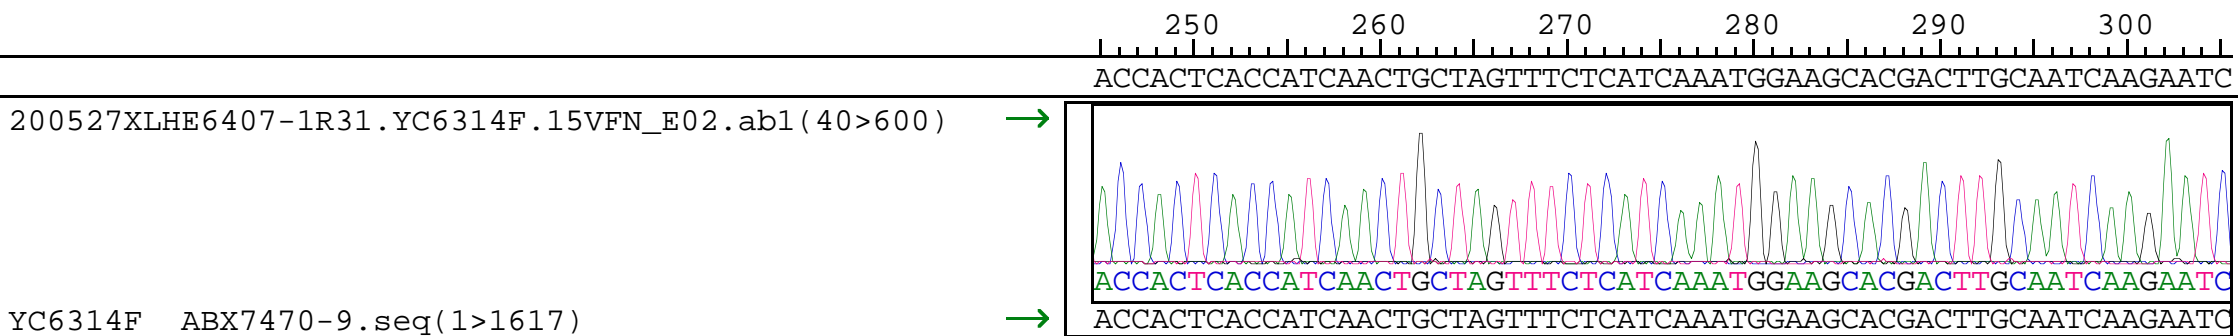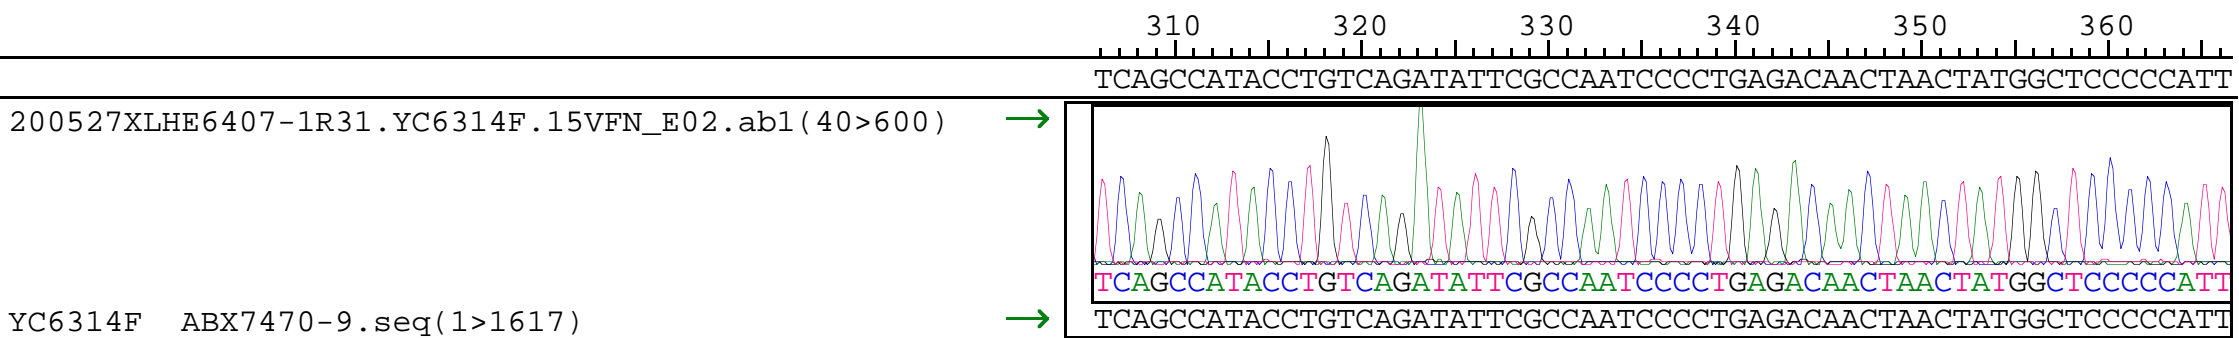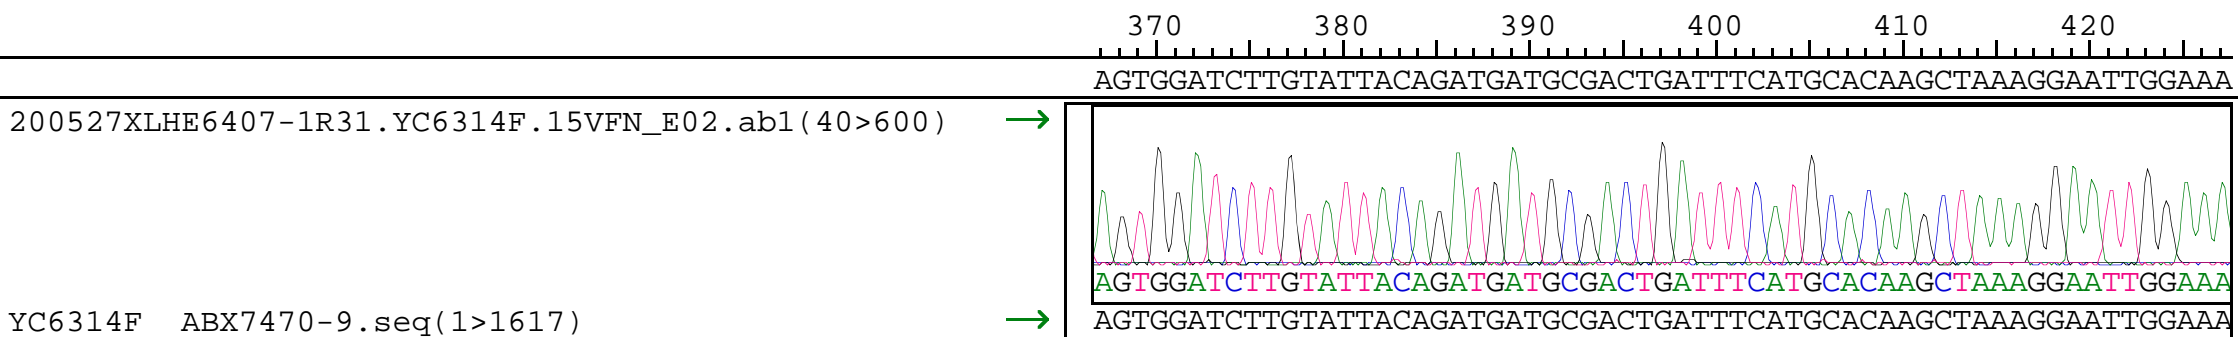

Project: YC6314F ABX7470-9.SQD Contig 1

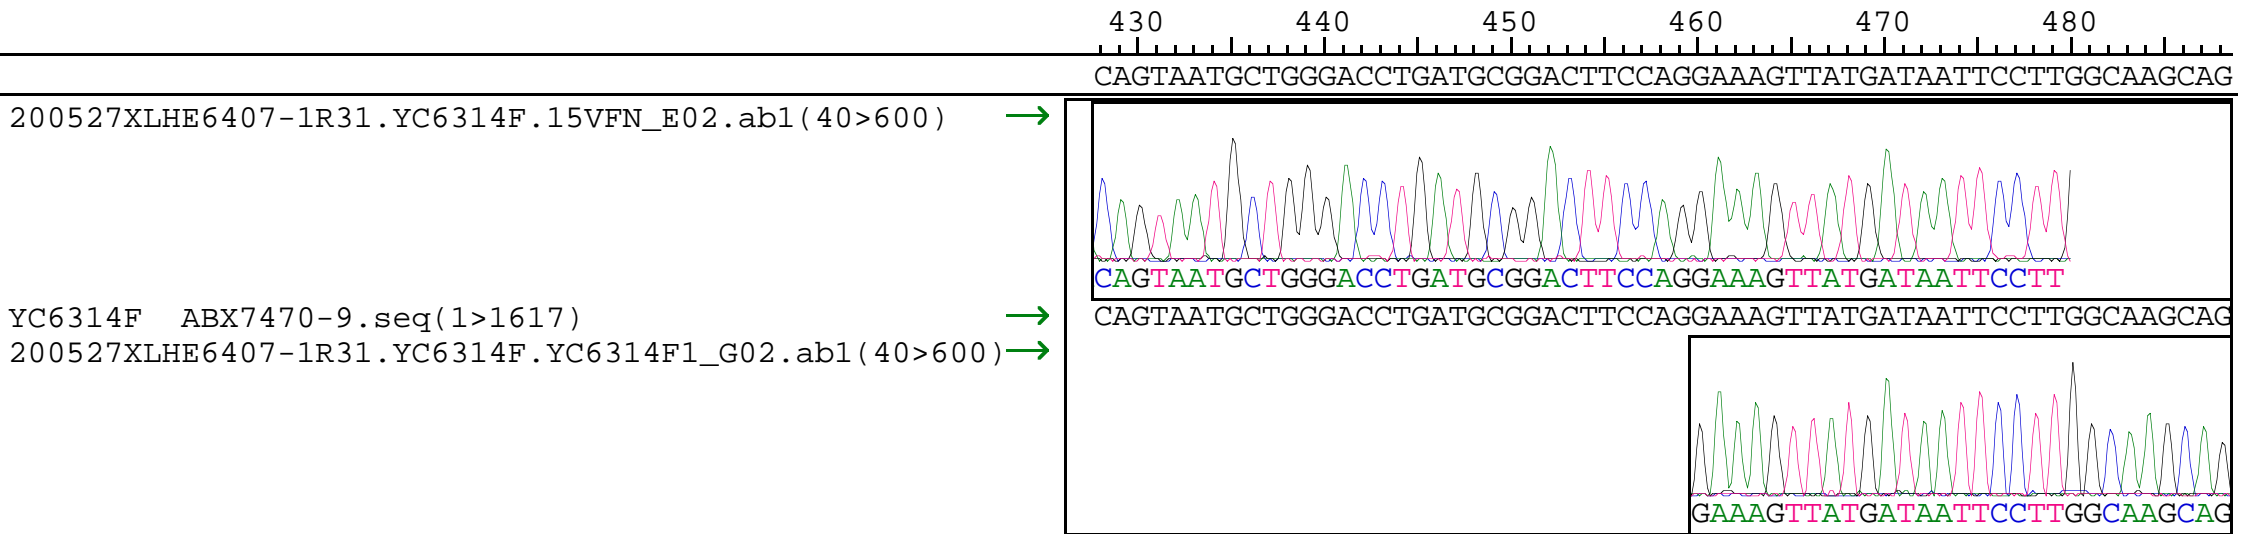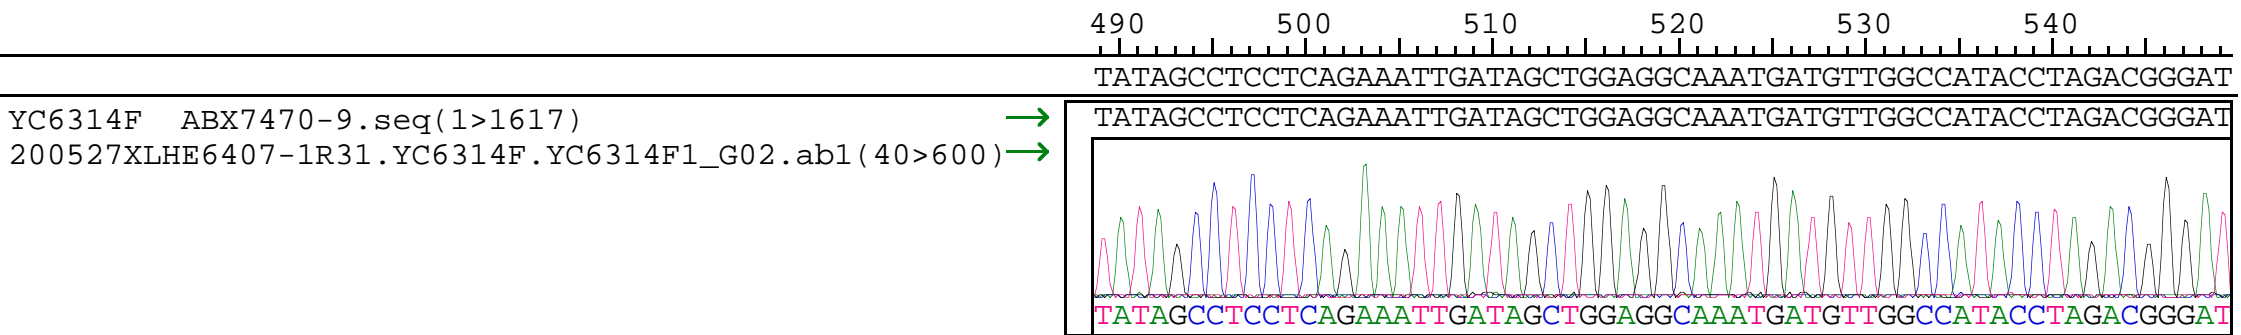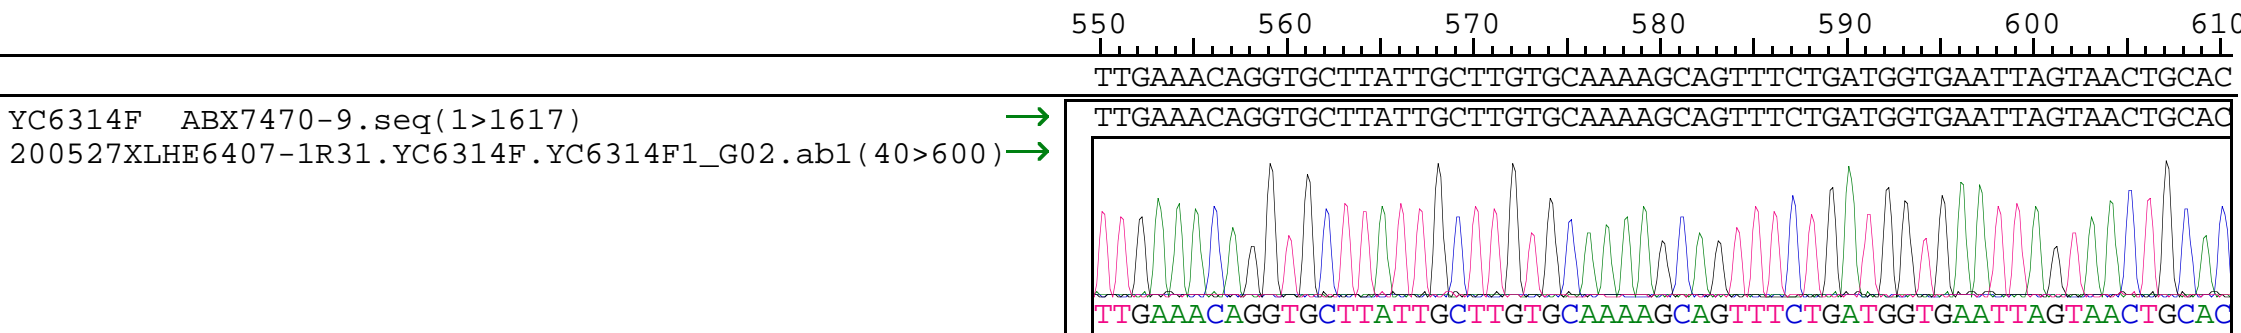

Project: YC6314F ABX7470-9.SQD Contig 1

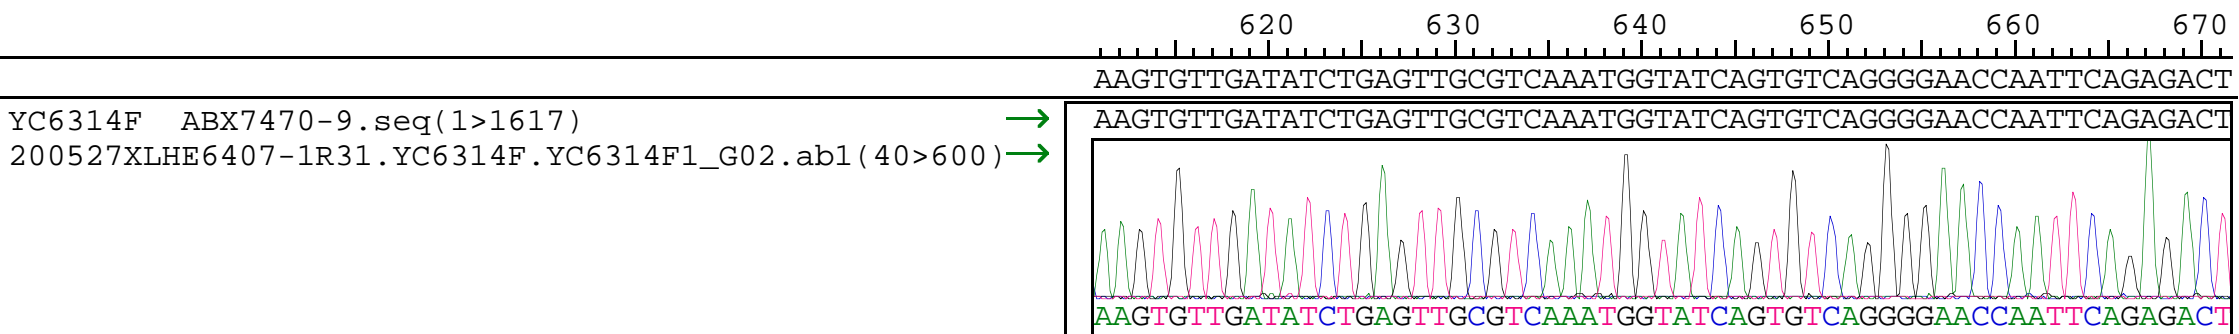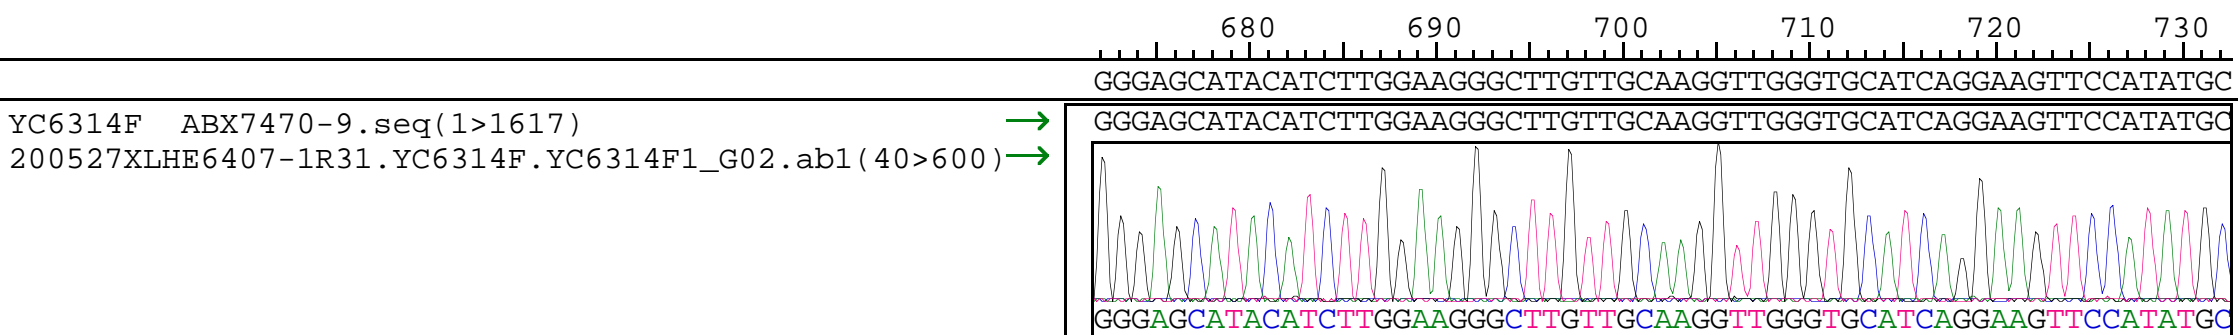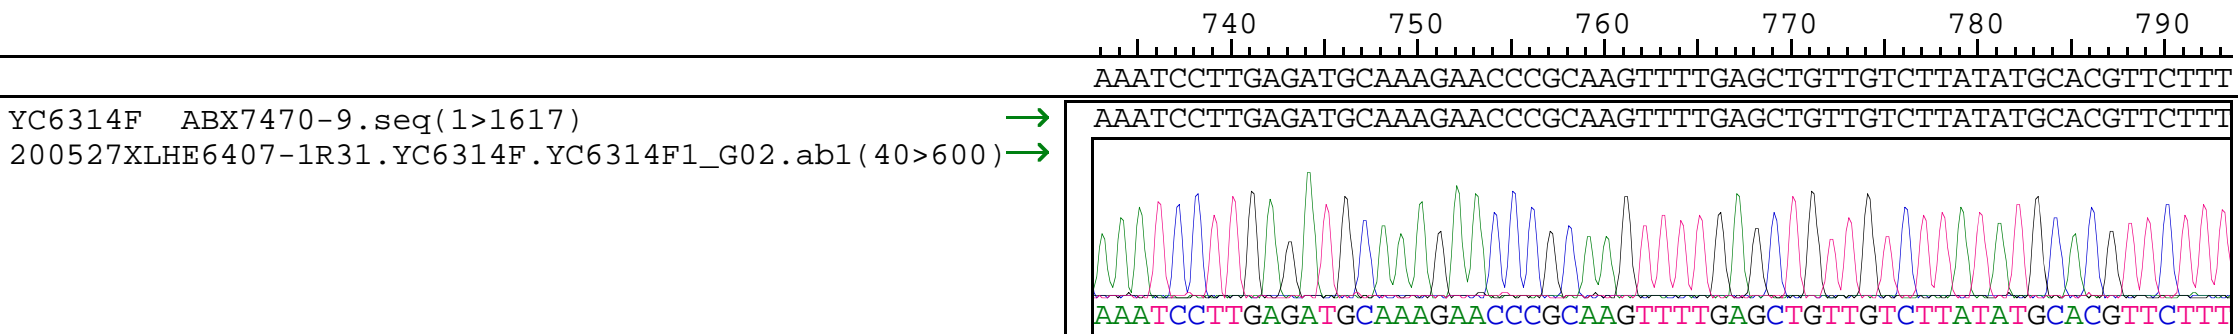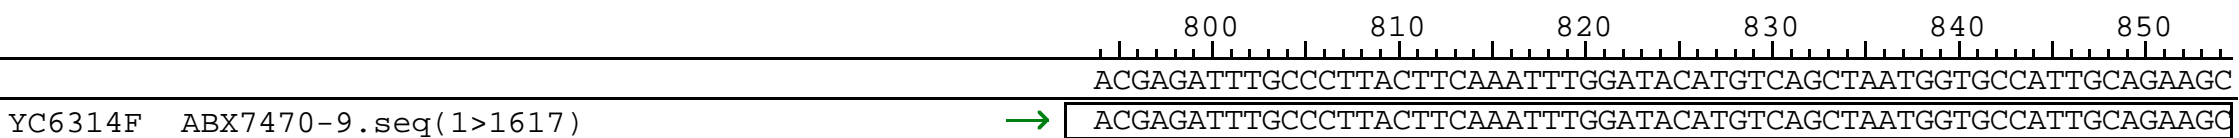

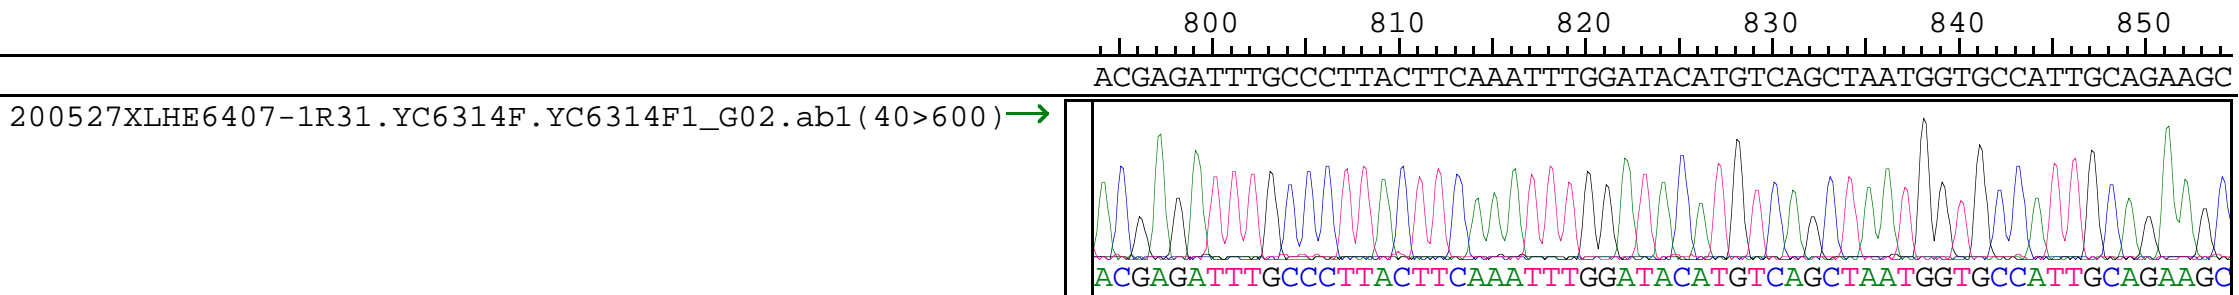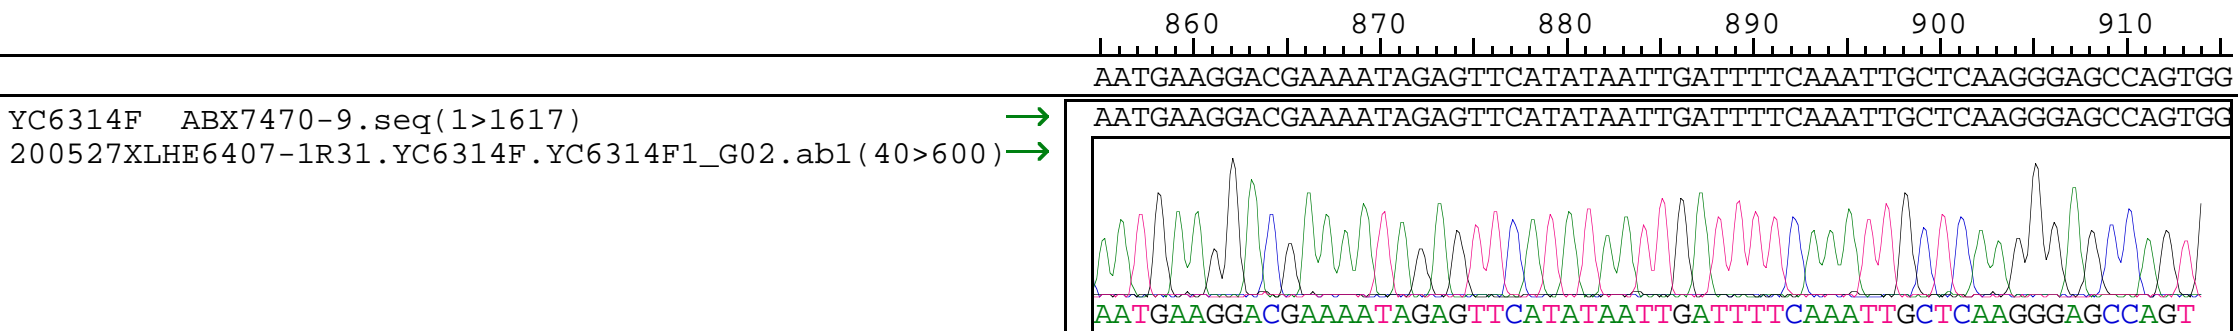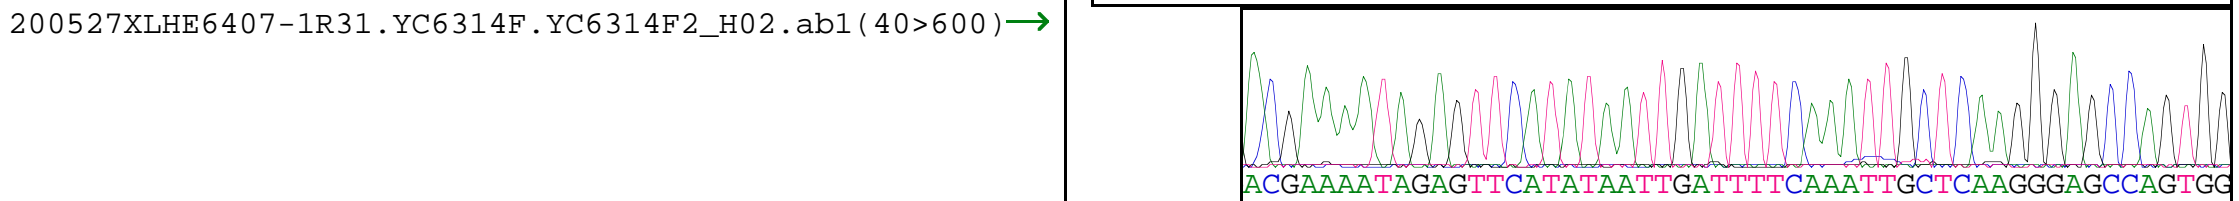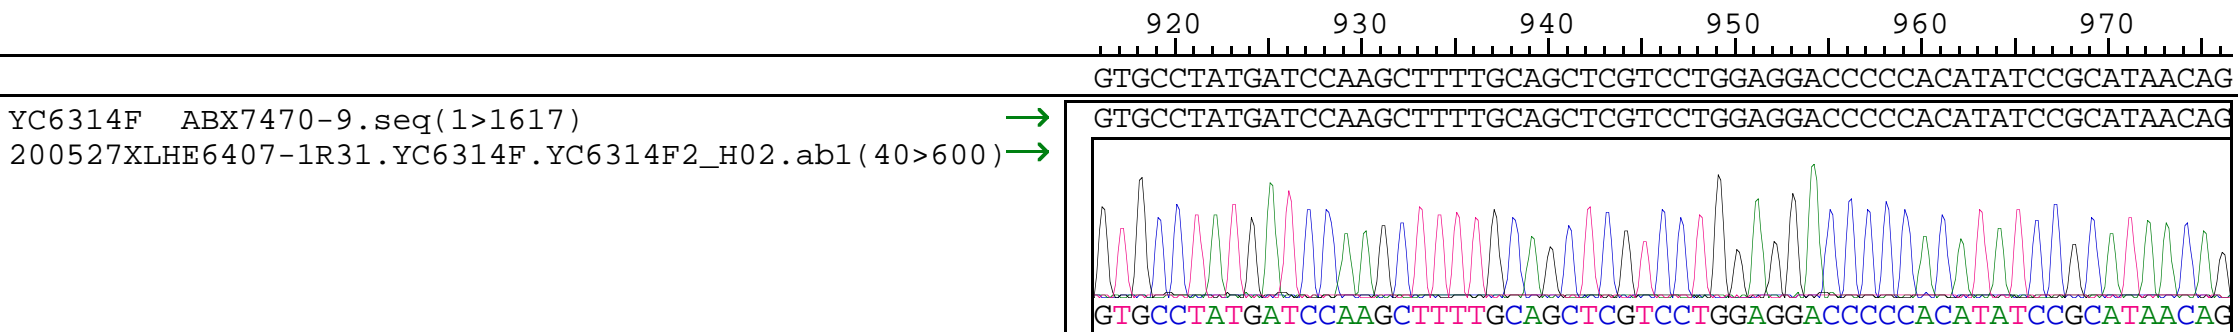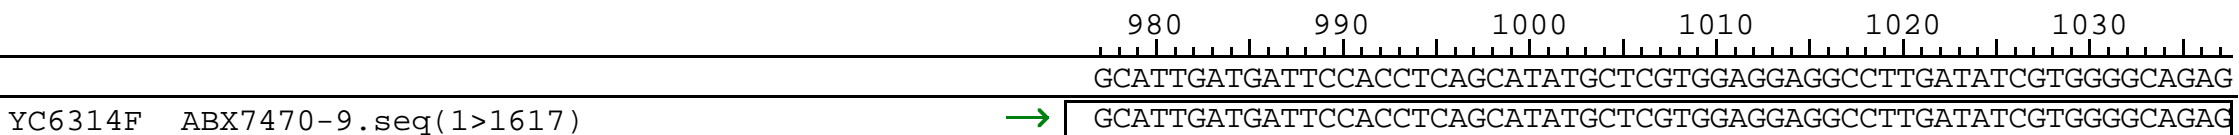

Project: YC6314F ABX7470-9.SQD Contig 1

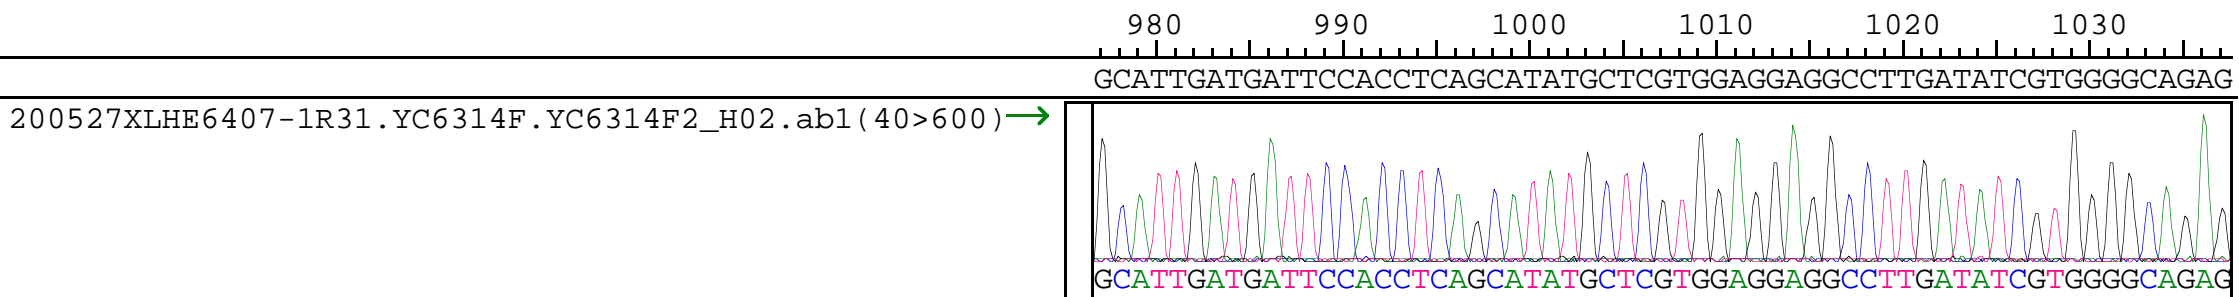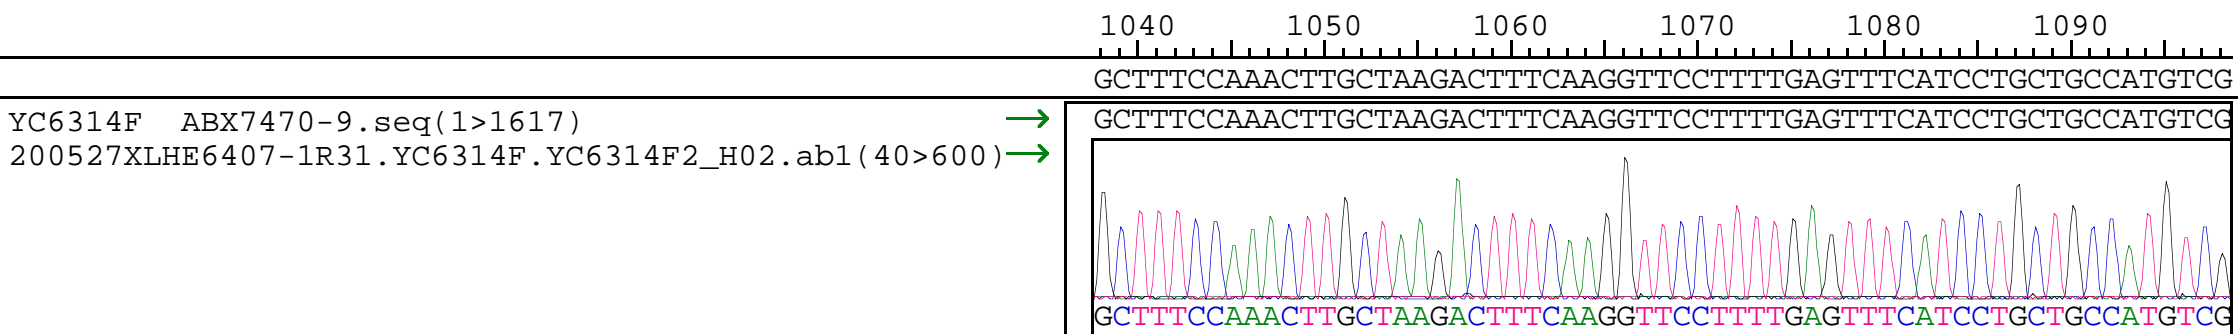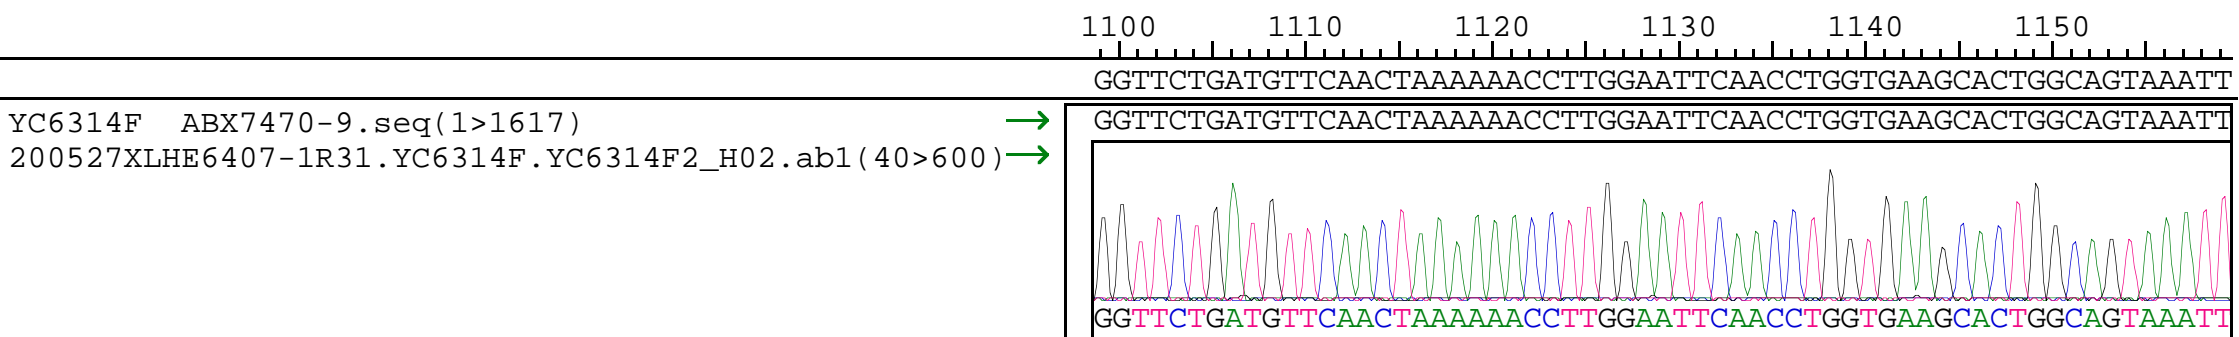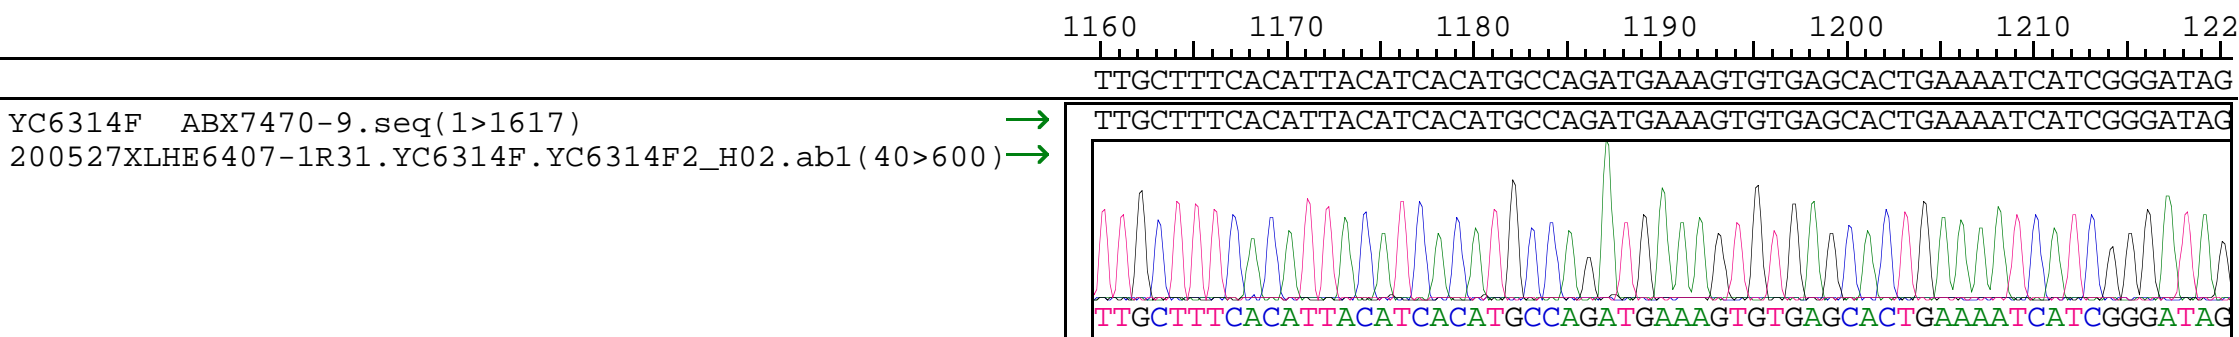

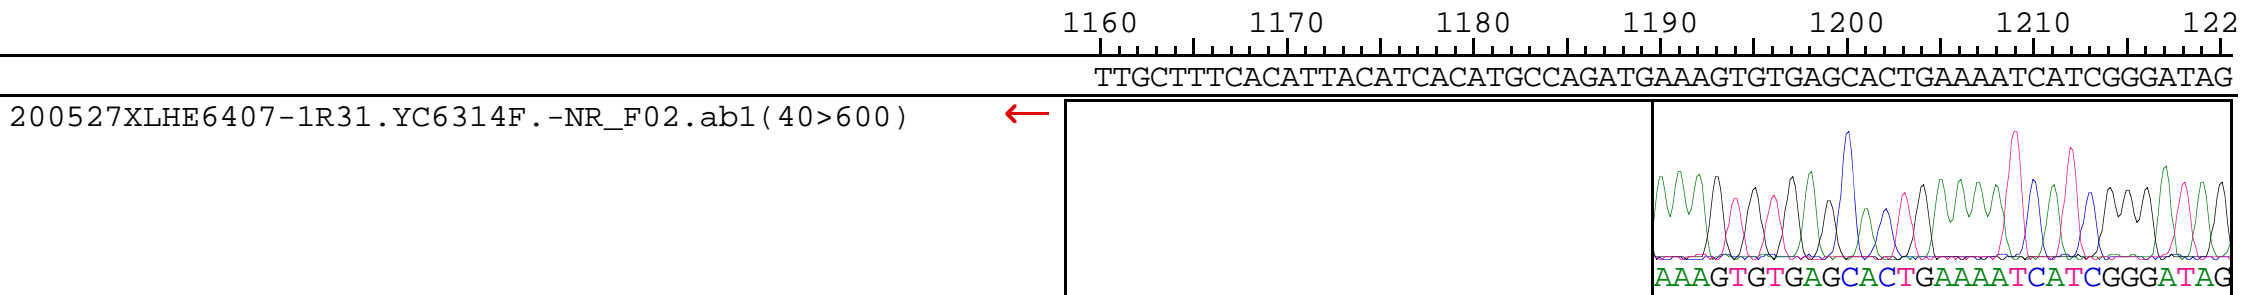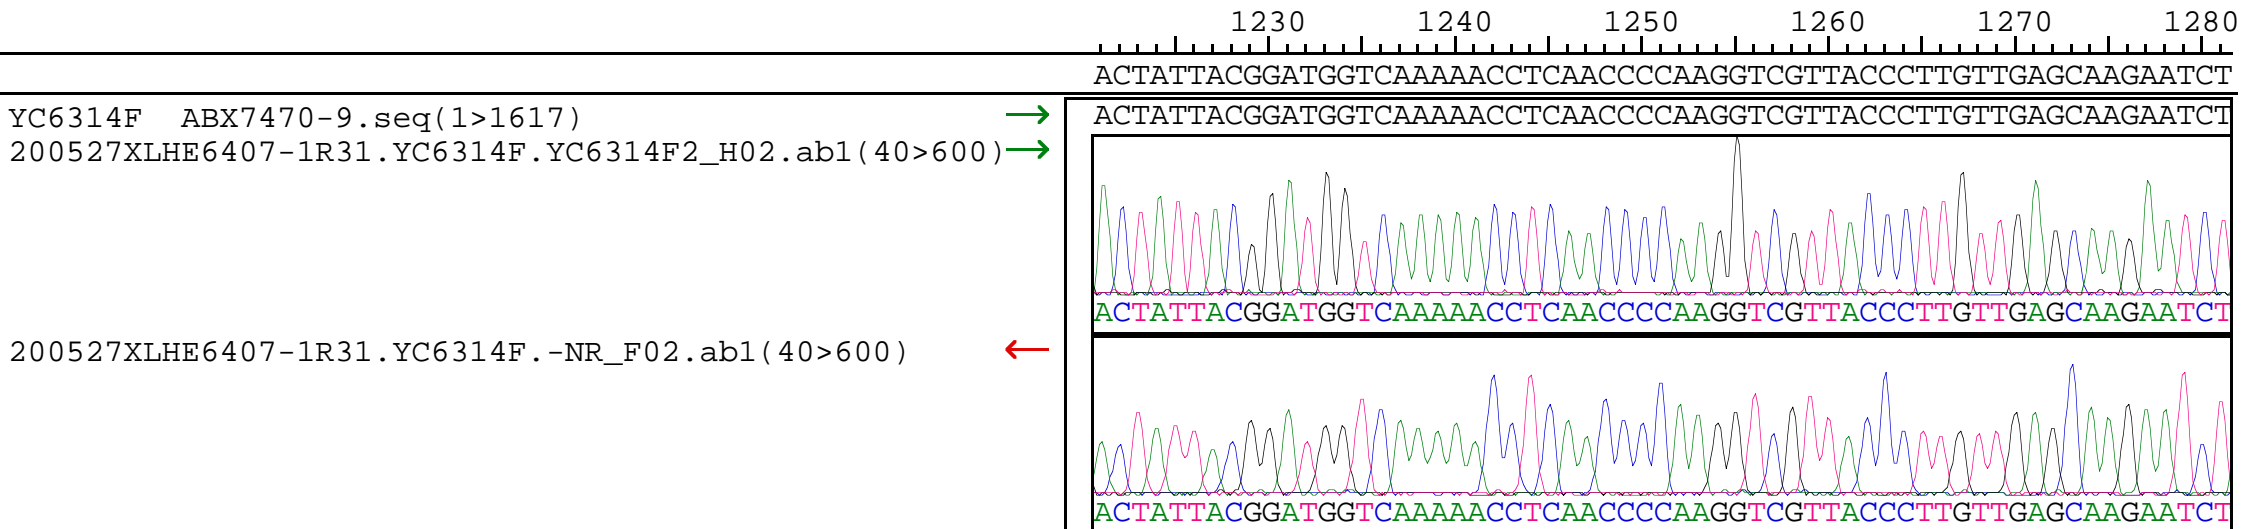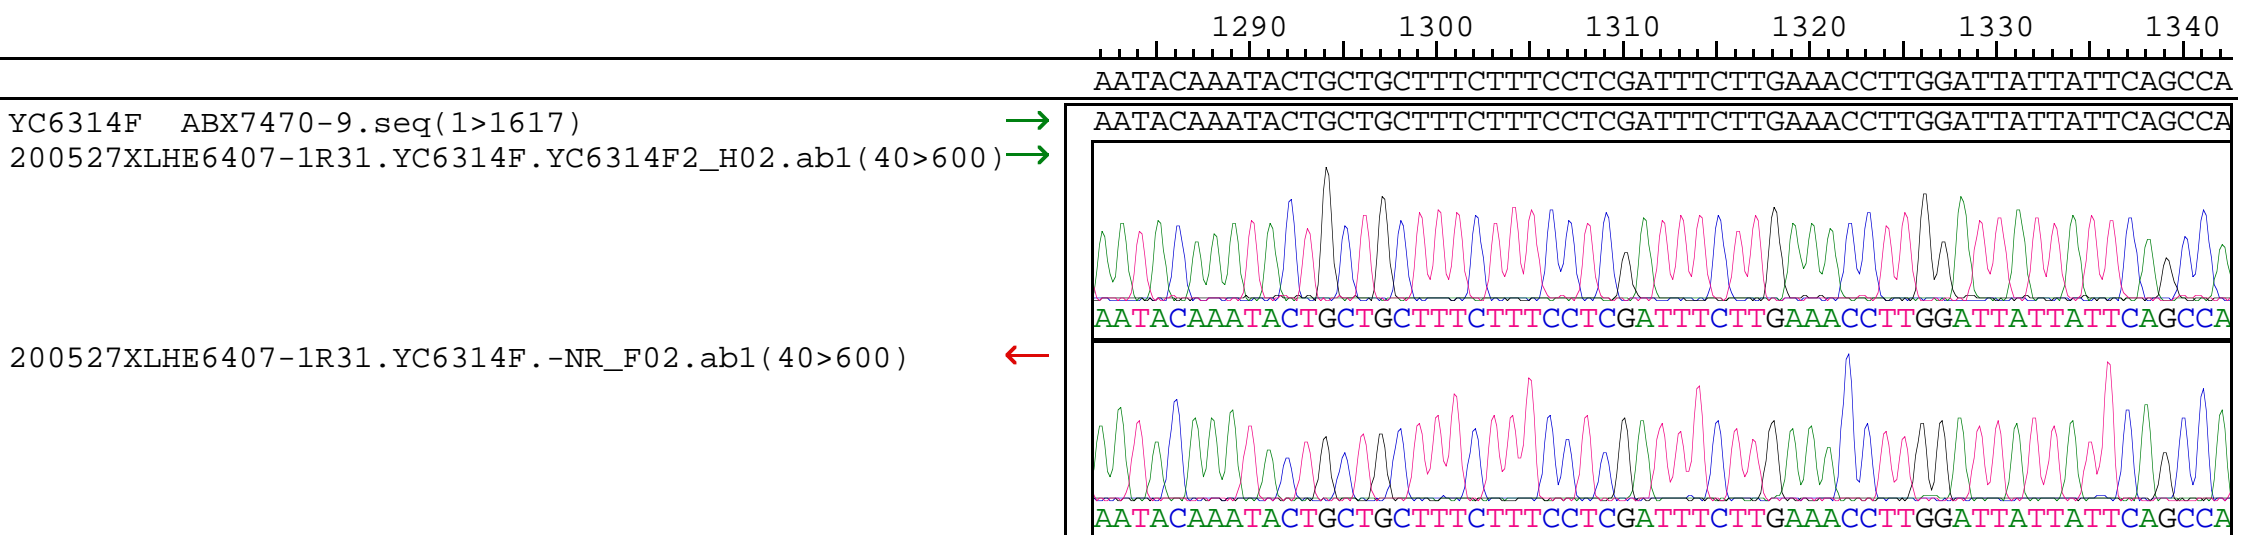

## Project: YC6314F ABX7470-9.SQD Contig 1

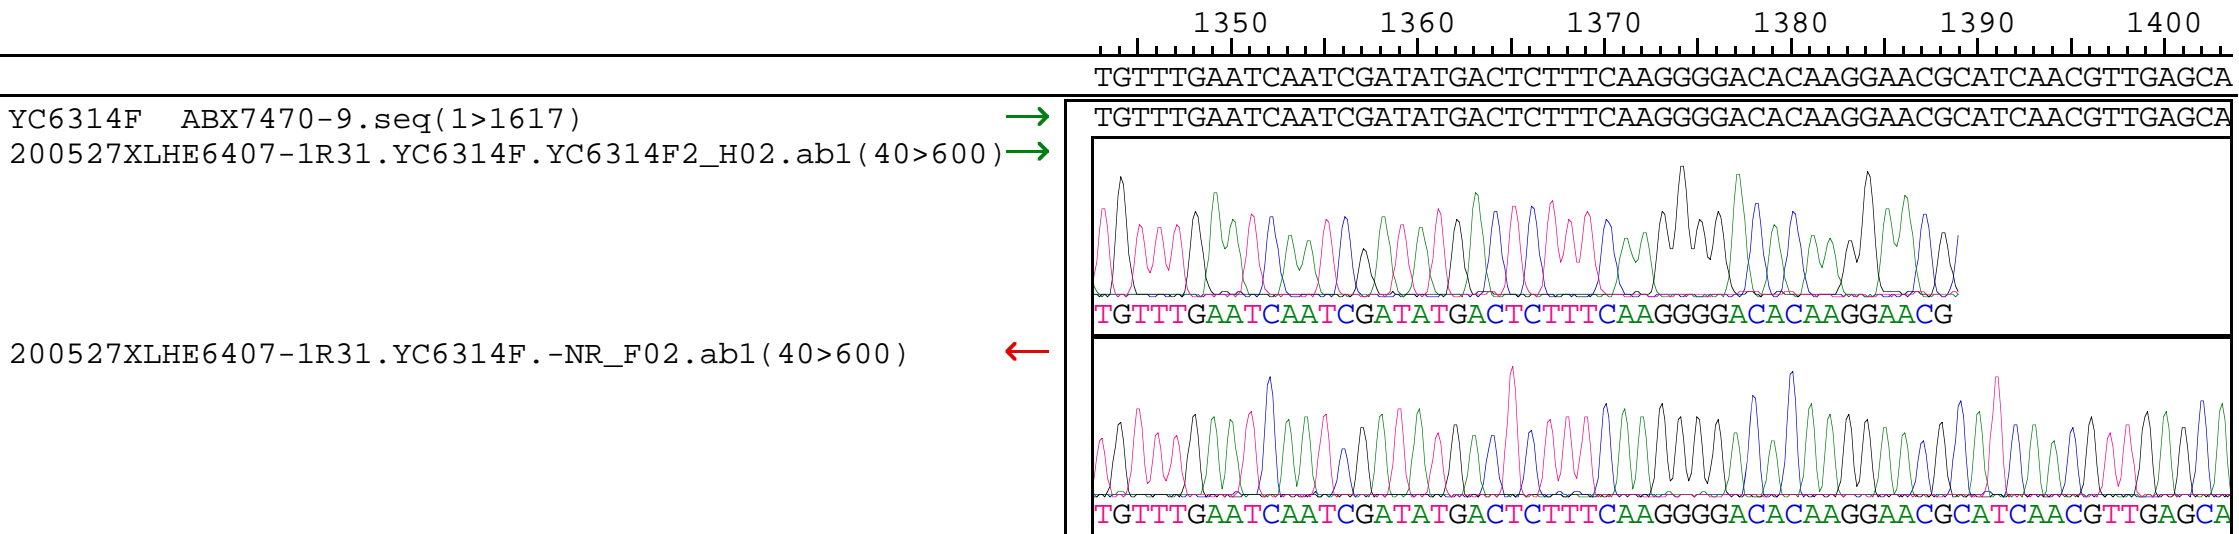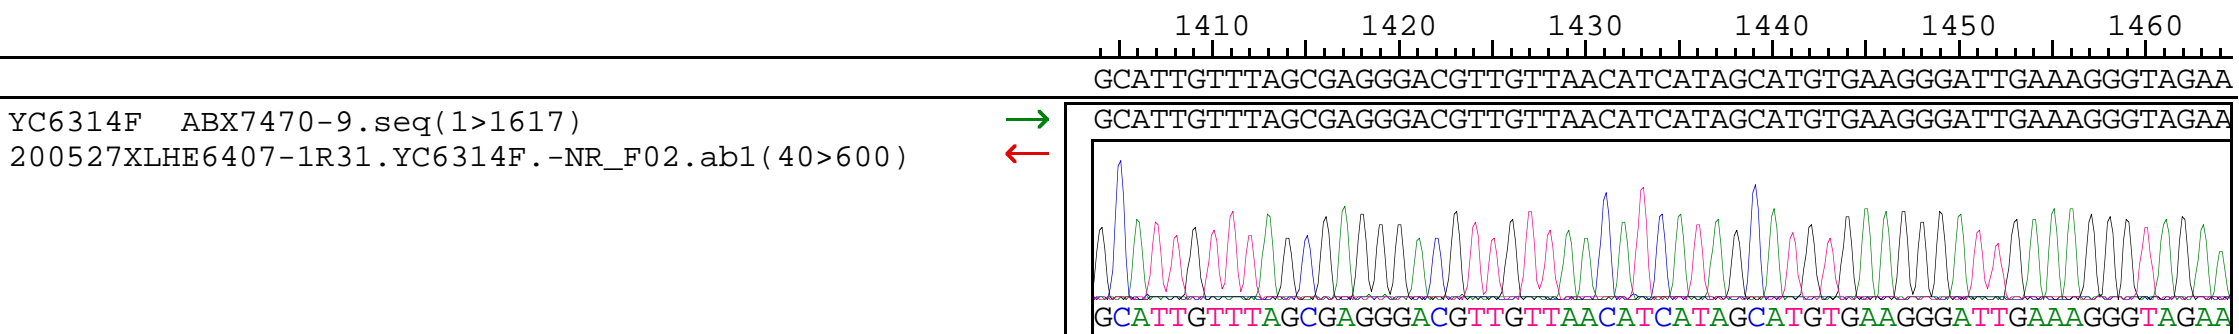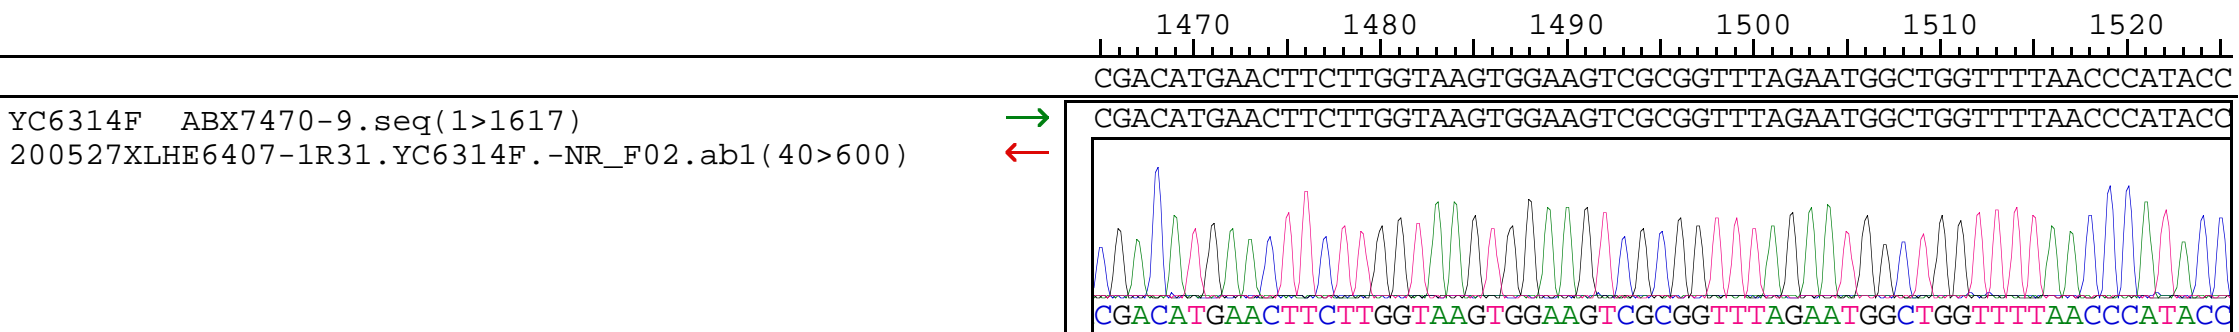

Project: YC6314F ABX7470-9.SQD Contig 1

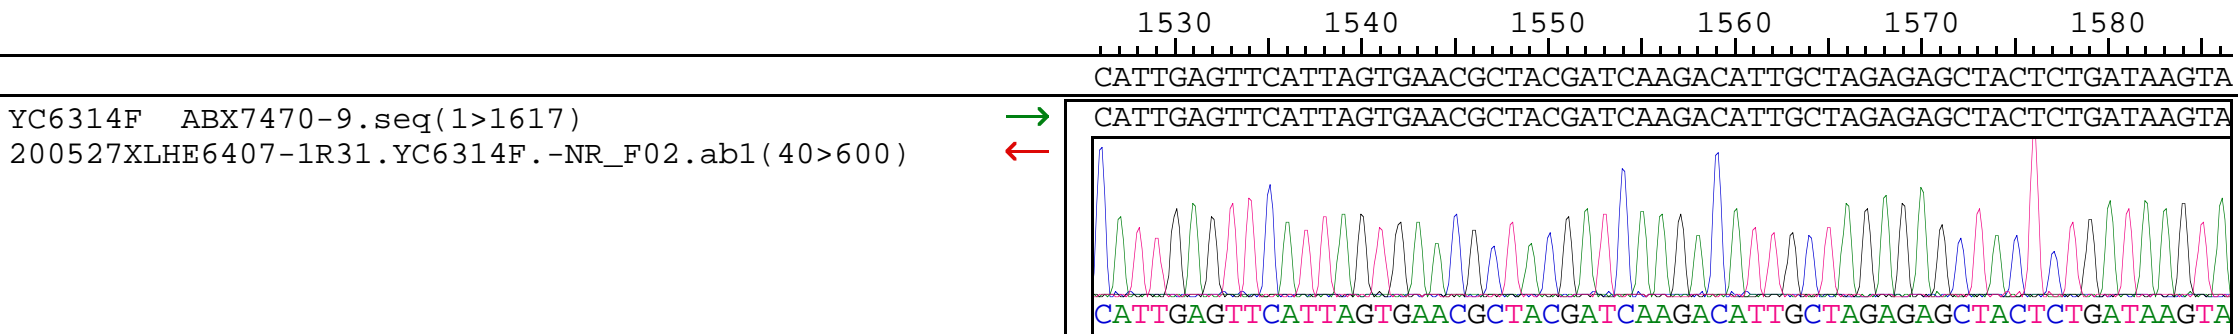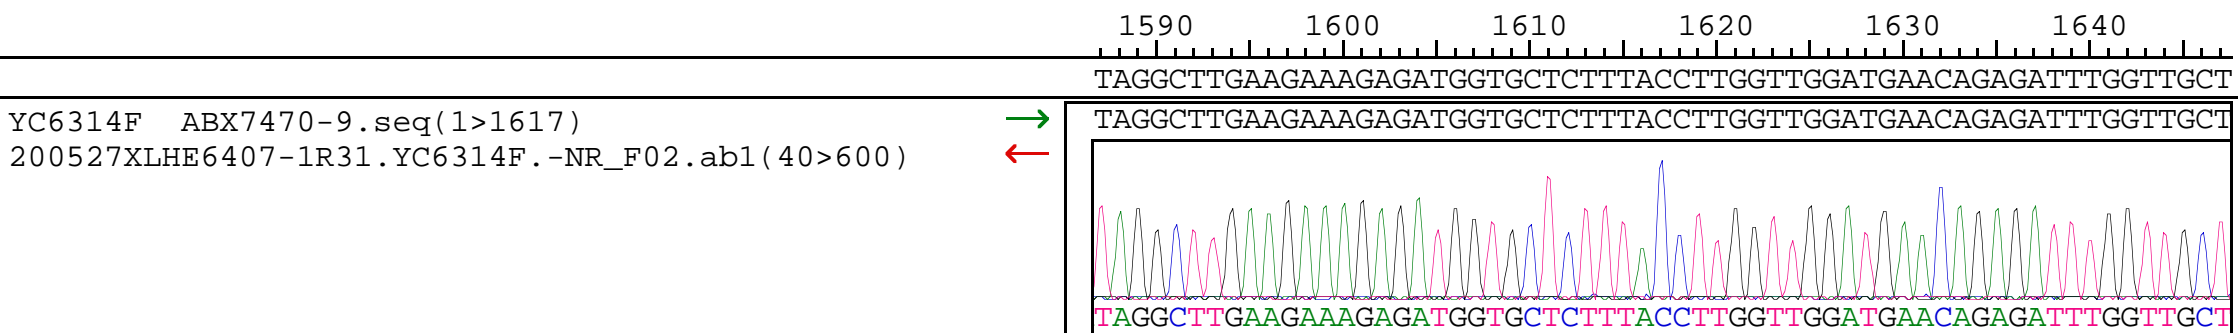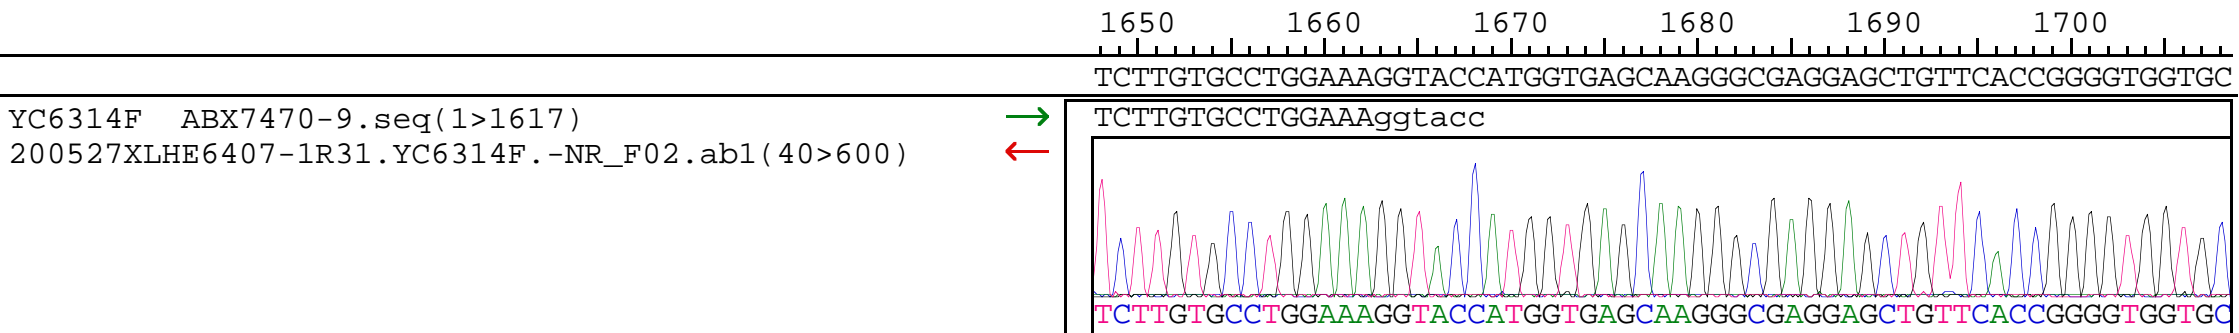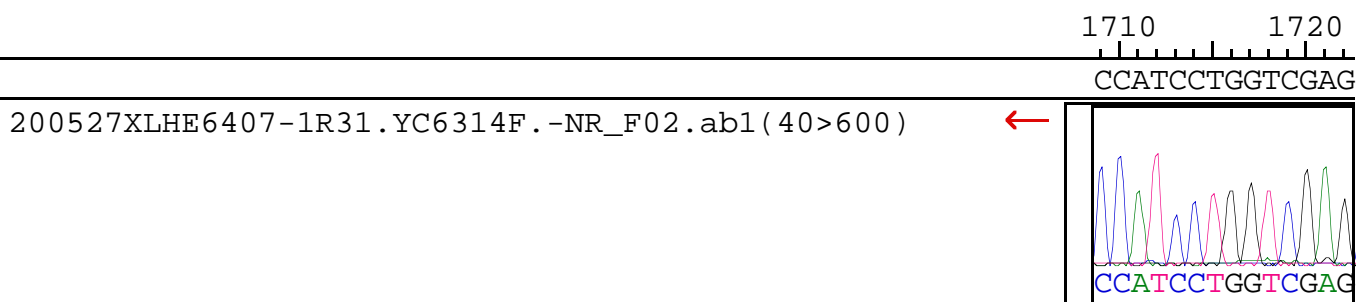

Supplement: Supplementary file 1 [file 106c017f386cd5ce706cb4db.pdf]
