# Supplementary material
Source: Research Square preprint supplement (doi:10.21203/rs.3.rs-8953685/v1)
Supplement: Supplementary file 1 [file 2e3fef3e699313c74fa563b3.docx]

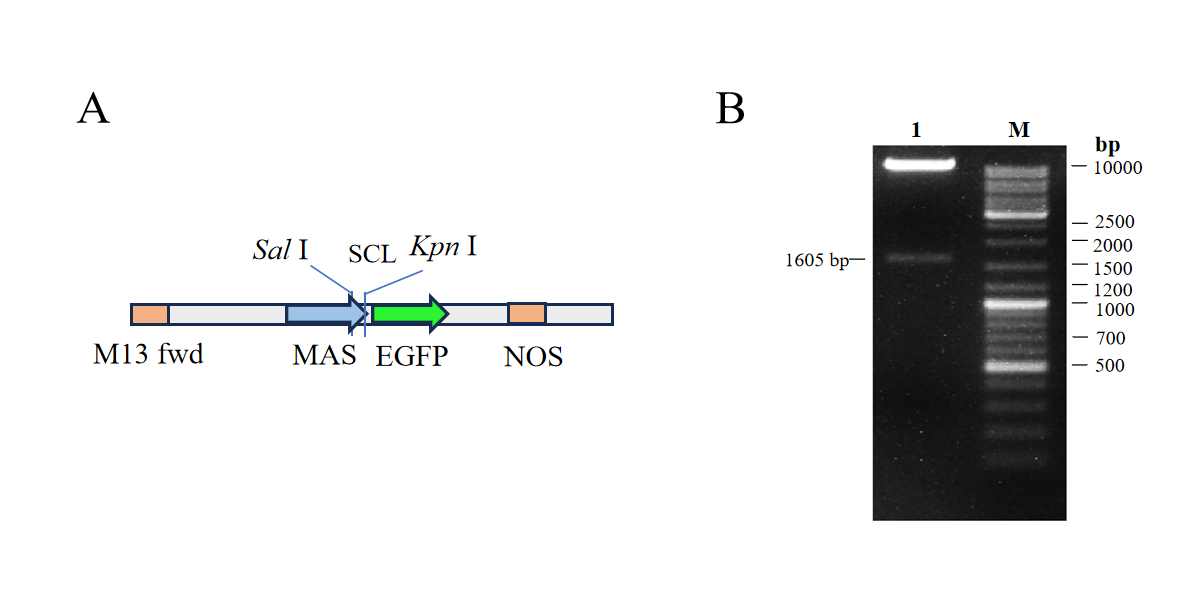


Fig. S3 Construction of *pCAMBIAsuper1300* subcellular localization vector

1. The map of *pCAMBIAsuper1300* vector and the clone site selected for constructing *pCAMBIAsuper1300*-*StSCL3* vector.

B. Double enzyme digestion electropherogram of *pCAMBIAsuper1300*-*StSCL3*.

Lane 1: *StSCL3* (1605 bp), linearized empty vectors (10 000 bp);

Lane M: RealBand DNA markers (100~10 000 bp) .

Supplementary Material: Sequencing Validation of pCAMBIA1300-*GFP-StSCL3*

The pCAMBIA1300-*GFP-StSCL3* were subjected to Sanger sequencing (Sangon Biotech, Shanghai, China) using vector-specific primers (forward primer: 5’-TGTAAAACGACGGCCAGT-3’; reverse primer: 5’-CAGGAAACAGCTATGACC-3’) for validation of the inserted fragment integrity. Sequencing quality was evaluated by Q30 score (≥ 80% of bases with Q30 ≥ 30, indicating high sequence accuracy).

The complete sequencing report is provided as Supplementary File (PDF format, YC6314F ABX7470-9) for peer review and reproducibility.
