# Supplementary material
Source: Research Square preprint supplement (doi:10.21203/rs.3.rs-8953685/v1)
Supplement: Supplementary file 2 [file 432a579aa35911d80a7e11af.xlsx]

## Sheet: Sheet1
Potato Gene Abbreviation	Potato Gene ID	Color	Chromosome Name	Chromosome Length	Start Position	End Position	Start Position (+20)	End Position (+20)	Other Species Gene Abbreviation	Other Species Gene ID	Color	Chromosome Name	Chromosome Length	Start Position	End Position	Start Position (+20)	End Position (+20)
StSCL04	PGSC0003DMT400005481	153,50,204	St06	59476545	4676162	4678399	4676182	4678419	CaSCL29	PHT80217	70130180	Ca06	242241289	237275884	237278136	237275904	237278156
StSCL06	PGSC0003DMT400007879	153,50,204	St08	56938330	54103248	54105287	54103268	54105307	CaSCL57	PHT92488	70130180	Ca01	309102287	6932676	6934712	6932696	6934732
StSCL07	PGSC0003DMT400010158	153,50,204	St11	45415722	7264053	7265537	7264073	7265557	CaSCL07	PHT65543	70130180	Ca12	250929874	46768747	46770210	46768767	46770230
StSCL08	PGSC0003DMT400011838	153,50,204	St12	61151464	60448976	60450319	60448996	60450339	CaSCL10	PHT66909	70130180	Ca12	250929874	247285252	247286664	247285272	247286684
StSCL10	PGSC0003DMT400011954	153,50,204	St12	61151464	59969041	59970579	59969061	59970599	CaSCL11	PHT66972	70130180	Ca12	250929874	248237097	248238650	248237117	248238670
StSCL11	PGSC0003DMT400012104	153,50,204	St08	56938330	52452092	52454194	52452112	52454214	CaSCL58	PHT92692	70130180	Ca01	309102287	10714161	10716242	10714181	10716262
StSCL12	PGSC0003DMT400015695	153,50,204	St07	56714099	44499007	44500614	44499027	44500634	CaSCL20	PHT76291	70130180	Ca07	251293532	193687193	193688818	193687213	193688838
StSCL15	PGSC0003DMT400018792	153,50,204	St06	59476545	200310	202151	200330	202171	CaSCL25	PHT77595	70130180	Ca06	242241289	170158	171930	170178	171950
StSCL16	PGSC0003DMT400021748	153,50,204	St05	52040326	49804351	49806030	49804371	49806050	CaSCL40	PHT82353	70130180	Ca05	238597879	233005299	233006921	233005319	233006941
StSCL17	PGSC0003DMT400022996	153,50,204	St09	61540138	1652600	1654885	1652620	1654905	CaSCL13	PHT70527	70130180	Ca10	233321800	174002361	174005359	174002381	174005379
StSCL21	PGSC0003DMT400023877	153,50,204	St11	45415722	8991422	8992660	8991442	8992680	CaSCL43	PHT83714	70130180	Ca04	240120734	160604663	160607886	160604683	160607906
StSCL22	PGSC0003DMT400026240	153,50,204	St03	62263542	43813357	43815321	43813377	43815341	CaSCL48	PHT87303	70130180	Ca03	282780301	234903746	234905671	234903766	234905691
StSCL25	PGSC0003DMT400033037	153,50,204	St02	48614561	40828385	40830022	40828405	40830042	CaSCL51	PHT91183	70130180	Ca02	169555599	154933863	154935509	154933883	154935529
StSCL27	PGSC0003DMT400034764	153,50,204	St11	45415722	384245	385849	384265	385869	CaSCL05	PHT64627	70130180	Ca12	250929874	2045653	2047251	2045673	2047271
StSCL27	PGSC0003DMT400034764	153,50,204	St11	45415722	384245	385849	384265	385869	CaSCL03	PHT62521	70130180	PGAv.1.6.scaffold1263	645535	348742	350376	348762	350396
StSCL28	PGSC0003DMT400036577	153,50,204	St12	61151464	52626335	52626727	52626355	52626747	CaSCL09	PHT66278	70130180	Ca12	250929874	211589812	211591512	211589832	211591532
StSCL30	PGSC0003DMT400037884	153,50,204	St08	56938330	6300326	6301585	6300346	6301605	CaSCL65	PHT95680	70130180	Ca01	309102287	284630272	284631639	284630292	284631659
StSCL33	PGSC0003DMT400038574	153,50,204	St02	48614561	40547608	40549443	40547628	40549463	CaSCL52	PHT91209	70130180	Ca02	169555599	155270383	155272241	155270403	155272261
StSCL34	PGSC0003DMT400039455	153,50,204	St03	62263542	50652743	50654344	50652763	50654364	CaSCL49	PHT87923	70130180	Ca03	282780301	261026884	261027873	261026904	261027893
StSCL35	PGSC0003DMT400040589	153,50,204	St11	45415722	1665767	1667533	1665787	1667553	CaSCL06	PHT64689	70130180	Ca12	250929874	3093046	3094836	3093066	3094856
StSCL37	PGSC0003DMT400049420	153,50,204	St10	59725670	51169422	51171416	51169442	51171436	CaSCL13	PHT70527	70130180	Ca10	233321800	174002361	174005359	174002381	174005379
StSCL41	PGSC0003DMT400049492	153,50,204	St07	56714099	54095705	54097453	54095725	54097473	CaSCL22	PHT77194	70130180	Ca07	251293532	243813175	243814923	243813195	243814943
StSCL43	PGSC0003DMT400052191	153,50,204	St02	48614561	48123882	48125009	48123902	48125029	CaSCL56	PHT92073	70130180	Ca02	169555599	168960739	168963374	168960759	168963394
StSCL44	PGSC0003DMT400055239	153,50,204	St02	48614561	42726350	42727717	42726370	42727737	CaSCL54	PHT91499	70130180	Ca02	169555599	160448987	160450573	160449007	160450593
StSCL49	PGSC0003DMT400057111	153,50,204	St07	56714099	55324319	55325932	55324339	55325952	CaSCL23	PHT77352	70130180	Ca07	251293532	246682847	246684490	246682867	246684510
StSCL51	PGSC0003DMT400057265	153,50,204	St07	56714099	56306445	56307740	56306465	56307760	CaSCL24	PHT77552	70130180	Ca07	251293532	250861011	250862357	250861031	250862377
StSCL53	PGSC0003DMT400060553	153,50,204	St04	72169567	8825291	8826865	8825311	8826885	CaSCL03	PHT62521	70130180	PGAv.1.6.scaffold1263	645535	348742	350376	348762	350396
StSCL54	PGSC0003DMT400063769	153,50,204	St01	88626720	77899682	77901622	77899702	77901642	CaSCL02	PHT62458	70130180	PGAv.1.6.scaffold1273	637594	185315	187378	185335	187398
StSCL55	PGSC0003DMT400063944	153,50,204	St04	72169567	58007316	58008995	58007336	58009015	CaSCL44	PHT83885	70130180	Ca04	240120734	184030083	184031774	184030103	184031794
StSCL57	PGSC0003DMT400064187	153,50,204	St02	48614561	43034673	43035989	43034693	43036009	CaSCL53	PHT91482	70130180	Ca02	169555599	160024528	160025883	160024548	160025903
StSCL58	PGSC0003DMT400066799	153,50,204	St01	88626720	70244196	70246502	70244216	70246522	CaSCL64	PHT95438	70130180	Ca01	309102287	254511802	254514125	254511822	254514145
StSCL59	PGSC0003DMT400067360	153,50,204	St07	56714099	47586803	47588086	47586823	47588106	CaSCL19	PHT76170	70130180	Ca07	251293532	173785750	173787057	173785770	173787077
StSCL61	PGSC0003DMT400069845	153,50,204	St05	52040326	48677406	48679067	48677426	48679087	CaSCL37	PHT82189	70130180	Ca05	238597879	227399188	227407429	227399208	227407449
StSCL65	PGSC0003DMT400076932	153,50,204	St06	59476545	37601847	37603667	37601867	37603687	CaSCL48	PHT87303	70130180	Ca03	282780301	234903746	234905671	234903766	234905691
StSCL66	PGSC0003DMT400077972	153,50,204	St06	59476545	56727804	56730062	56727824	56730082	CaSCL29	PHT80217	70130180	Ca06	242241289	237275884	237278136	237275904	237278156
StSCL68	PGSC0003DMT400078286	153,50,204	St06	59476545	57636848	57638851	57636868	57638871	CaSCL31	PHT80364	70130180	Ca06	242241289	239475049	239477091	239475069	239477111
StSCL69	PGSC0003DMT400087504	153,50,204	St09	61540138	49967579	49969039	49967599	49969059	CaSCL47	PHT86687	70130180	Ca03	282780301	127914119	127915675	127914139	127915695
StSCL70	PGSC0003DMT400088400	153,50,204	St01	88626720	62789837	62791414	62789857	62791434	CaSCL60	PHT94578	70130180	Ca01	309102287	195746168	195748087	195746188	195748107
StSCL70	PGSC0003DMT400088400	153,50,204	St01	88626720	62789837	62791414	62789857	62791434	CaSCL25	PHT77595	70130180	Ca06	242241289	170158	171930	170178	171950
StSCL71	PGSC0003DMT400089692	153,50,204	St03	62263542	61601169	61602797	61601189	61602817	CaSCL46	PHT85997	70130180	Ca03	282780301	27186583	27188214	27186603	27188234
StSCL02	PGSC0003DMT400005479	153,50,204	St06	59476545	4676162	4676899	4676182	4676919	AtSCL33	At2G29060.1	255,0,0	At02	19698289	12481664	12484420	12481684	12484440
StSCL04	PGSC0003DMT400005481	153,50,204	St06	59476545	4676162	4678399	4676182	4678419	AtSCL31	At1G07520.2	255,0,0	At01	30427671	2309534	2312196	2309554	2312216
StSCL04	PGSC0003DMT400005481	153,50,204	St06	59476545	4676162	4678399	4676182	4678419	AtSCL33	At2G29060.2	255,0,0	At02	19698289	12481664	12484420	12481684	12484440
StSCL06	PGSC0003DMT400007879	153,50,204	St08	56938330	54103248	54105287	54103268	54105307	AtSCL28	At1G63100.1	255,0,0	At01	30427671	23399112	23402176	23399132	23402196
StSCL17	PGSC0003DMT400022996	153,50,204	St09	61540138	1652600	1654885	1652620	1654905	AtSCL14	At1G07530.1	255,0,0	At01	30427671	2313581	2316507	2313601	2316527
StSCL17	PGSC0003DMT400022996	153,50,204	St09	61540138	1652600	1654885	1652620	1654905	AtSCL09	At2G37650.1	255,0,0	At02	19698289	15792545	15795235	15792565	15795255
StSCL17	PGSC0003DMT400022996	153,50,204	St09	61540138	1652600	1654885	1652620	1654905	AtSCL33	At2G29060.1	255,0,0	At02	19698289	12481664	12484420	12481684	12484440
StSCL22	PGSC0003DMT400026240	153,50,204	St03	62263542	43813357	43815321	43813377	43815341	AtSCL08	At5G52510.1	255,0,0	At05	26975502	21307016	21309341	21307036	21309361
StSCL25	PGSC0003DMT400033037	153,50,204	St02	48614561	40828385	40830022	40828405	40830042	AtSCL15	At4G36710.1	255,0,0	At04	18585056	17305758	17307648	17305778	17307668
StSCL33	PGSC0003DMT400038574	153,50,204	St02	48614561	40547608	40549443	40547628	40549463	AtSCL07	At3G50650.1	255,0,0	At03	23459830	18806139	18808243	18806159	18808263
StSCL33	PGSC0003DMT400038574	153,50,204	St02	48614561	40547608	40549443	40547628	40549463	AtSCL04	At5G66770.1	255,0,0	At05	26975502	26660311	26662919	26660331	26662939
StSCL37	PGSC0003DMT400049420	153,50,204	St10	59725670	51169422	51171416	51169442	51171436	AtSCL09	At2G37650.1	255,0,0	At02	19698289	15792545	15795235	15792565	15795255
StSCL44	PGSC0003DMT400055239	153,50,204	St02	48614561	42726350	42727717	42726370	42727737	AtSHR	At4G37650.1	255,0,0	At04	18585056	17691687	17693859	17691707	17693879
StSCL51	PGSC0003DMT400057265	153,50,204	St07	56714099	56306445	56307740	56306465	56307760	AtSCL18	At1G55580.1	255,0,0	At01	30427671	20763844	20765823	20763864	20765843
StSCL57	PGSC0003DMT400064187	153,50,204	St02	48614561	43034673	43035989	43034693	43036009	AtSCL32	At3G49950.1	255,0,0	At03	23459830	18522466	18523934	18522486	18523954
StSCL57	PGSC0003DMT400064187	153,50,204	St02	48614561	43034673	43035989	43034693	43036009	AtSCL16	At5G67411.1	255,0,0	At05	26975502	26898077	26899736	26898097	26899756
StSCL58	PGSC0003DMT400066799	153,50,204	St01	88626720	70244196	70246502	70244216	70246522	AtSCL27	At2G45160.1	255,0,0	At02	19698289	18617862	18620451	18617882	18620471
StSCL58	PGSC0003DMT400066799	153,50,204	St01	88626720	70244196	70246502	70244216	70246522	AtSCL22	At3G60630.1	255,0,0	At03	23459830	22410240	22412663	22410260	22412683
StSCL58	PGSC0003DMT400066799	153,50,204	St01	88626720	70244196	70246502	70244216	70246522	AtSCL06	At4G00150.1	255,0,0	At04	18585056	57140	59495	57160	59515
StSCL65	PGSC0003DMT400076932	153,50,204	St06	59476545	37601847	37603667	37601867	37603687	AtSCL08	At5G52510.1	255,0,0	At05	26975502	21307016	21309341	21307036	21309361
StSCL66	PGSC0003DMT400077972	153,50,204	St06	59476545	56727804	56730062	56727824	56730082	AtSCL31	At1G07520.4	255,0,0	At01	30427671	2309542	2312203	2309562	2312223
StSCL66	PGSC0003DMT400077972	153,50,204	St06	59476545	56727804	56730062	56727824	56730082	AtSCL33	At2G29060.1	255,0,0	At02	19698289	12481664	12484420	12481684	12484440
StSCL12	PGSC0003DMT400015695	153,50,204	St07	56714099	44499007	44500614	44499027	44500634	NtSCL03	OIT00757	46,139,87	Nt07	114765206	62080507	62082348	62080527	62082368
StSCL15	PGSC0003DMT400018792	153,50,204	St06	59476545	200310	202151	200330	202171	NtSCL13	OIT06976	46,139,87	Nt02	96359640	94585680	94587838	94585700	94587858
StSCL27	PGSC0003DMT400034764	153,50,204	St11	45415722	384245	385849	384265	385869	NtSCL10	OIT05398	46,139,87	Nt02	96359640	721003	723392	721023	723412
StSCL53	PGSC0003DMT400060553	153,50,204	St04	72169567	8825291	8826865	8825311	8826885	NtSCL10	OIT05398	46,139,87	Nt02	96359640	721003	723392	721023	723412
StSCL71	PGSC0003DMT400089692	153,50,204	St03	62263542	61601169	61602797	61601189	61602817	NtSCL51	OIS96574	46,139,87	Nt11	61252062	2163867	2165681	2163887	2165701
StSCL15	PGSC0003DMT400018792	153,50,204	St06	59476545	200310	202151	200330	202171	SlSCL23	Solyc06g009610.1.1	210,105,30	Sl06	49794276	3573963	3577398	3573983	3577418
StSCL18	PGSC0003DMT400022997	153,50,204	St09	61540138	1652600	1654885	1652620	1654905	SlSCL26	Solyc06g076280.2.1	210,105,30	Sl06	49794276	47541025	47545353	47541045	47545373
StSCL27	PGSC0003DMT400034764	153,50,204	St11	45415722	384245	385849	384265	385869	SlSCL18	Solyc04g014830.2.1	210,105,30	Sl04	66557038	5064808	5070491	5064828	5070511
StSCL36	PGSC0003DMT400043358	153,50,204	St10	59725670	48250502	48254367	48250522	48254387	SlSCL41	Solyc10g074680.2.1	210,105,30	Sl10	65633393	58293407	58298528	58293427	58298548
StSCL38	PGSC0003DMT400049445	153,50,204	St10	59725670	51394181	51395446	51394201	51395466	SlSCL42	Solyc10g086370.2.1	210,105,30	Sl10	65633393	65341804	65346856	65341824	65346876
StSCL43	PGSC0003DMT400052191	153,50,204	St02	48614561	48123882	48125009	48123902	48125029	SlSCL13	Solyc02g094340.1.1	210,105,30	Sl02	55977580	55531865	55534361	55531885	55534381
StSCL45	PGSC0003DMT400056120	153,50,204	St12	61151464	8029576	8031255	8029596	8031275	SlSCL49	Solyc12g005340.2.1	210,105,30	Sl12	68126176	211547	214276	211567	214296
StSCL48	PGSC0003DMT400056232	153,50,204	St01	88626720	45193225	45194469	45193245	45194489	SlSCL03	Solyc01g059950.1.1	210,105,30	Sl01	98455869	69289392	69292468	69289412	69292488
StSCL53	PGSC0003DMT400060553	153,50,204	St04	72169567	8825291	8826865	8825311	8826885	SlSCL18	Solyc04g014830.2.1	210,105,30	Sl04	66557038	5064808	5070491	5064828	5070511
StSCL58	PGSC0003DMT400066799	153,50,204	St01	88626720	70244196	70246502	70244216	70246522	SlSCL07	Solyc01g090950.3.1	210,105,30	Sl01	98455869	84531714	84541050	84531734	84541070
StSCL59	PGSC0003DMT400067360	153,50,204	St07	56714099	47586803	47588086	47586823	47588106	SlSCL30	Solyc07g052960.2.1	210,105,30	Sl07	68175699	61493972	61504673	61493992	61504693
StSCL61	PGSC0003DMT400069845	153,50,204	St05	52040326	48677406	48679067	48677426	48679087	SlSCL40	Solyc09g090835.1.1	210,105,30	Sl09	72906345	70715435	70717173	70715455	70717193
StSCL70	PGSC0003DMT400088400	153,50,204	St01	88626720	62789837	62791414	62789857	62791434	SlSCL05	Solyc01g079370.3.1	210,105,30	Sl01	98455869	78315639	78319383	78315659	78319403
StSCL70	PGSC0003DMT400088400	153,50,204	St01	88626720	62789837	62791414	62789857	62791434	SlSCL23	Solyc06g009610.1.1	210,105,30	Sl06	49794276	3573963	3577398	3573983	3577418
