# Supplementary material
Source: Research Square preprint supplement (doi:10.21203/rs.3.rs-8953685/v1)
Supplement: Supplementary file 4 [file 51d194d97dd060a4ac0db56d.xlsx]

## Sheet: ABA
	RGL	Actin	∆Ct	∆∆Ct	2 -(∆∆Ct)
WT	20.483	27.543	-7.0599	0	1
WT	20.938	27.853	-6.91448	0.145424	0.904114
WT	20.1	25.797	-5.69719	1.36271	0.38885
ABA-1	18.759	26.219	-7.46001	-0.400108	1.31961
ABA-1	19.545	25.956	-6.41099	0.648914	0.63776
ABA-1	17.447	26.056	-8.60853	-1.54862	2.92538
ABA-2	21.383	26.584	-5.20105	1.85885	0.275696
ABA-2	22.384	26.374	-3.99002	3.06988	0.119089
ABA-2	19.969	26.174	-6.20493	0.854977	0.552874
ABA-3	21.738	25.898	-4.16075	2.89915	0.13405
ABA-3	21.993	25.562	-3.56947	3.49043	0.0889767
ABA-3	16.404	26.576	-10.1714	-3.11151	8.64286
ABA-4	22.153	25.631	-3.47816	3.58174	0.0835195
ABA-4	16.424	25.695	-9.27102	-2.21112	4.63034
ABA-4	16.794	25.852	-9.0584	-1.9985	3.99583
ABA-5	21.62	25.328	-3.70798	3.35192	0.0979425
ABA-5	16.71	25.538	-8.82801	-1.7681	3.40606
ABA-5	21.594	25.505	-3.91059	3.14931	0.11271

## Sheet: GA
	RGL	Actin	∆Ct	∆∆Ct	2 -(∆∆Ct)
WT	16.724	25.415	-8.69098	0	1
WT	15.878	25.981	-10.1032	-1.41223	2.66148
WT	16.273	25.08	-8.80743	-0.116451	1.08407
GA-1	13.972	24.42	-10.4478	-1.75684	3.37956
GA-1	13.688	24.143	-10.4552	-1.7642	3.39686
GA-1	15.408	23.847	-8.43916	0.251816	0.839839
GA-2	13.538	23.547	-10.0096	-1.31863	2.4943
GA-2	14.669	23.799	-9.12998	-0.439001	1.35567
GA-2	14.662	23.961	-9.29887	-0.60789	1.52403
GA-3	14.012	24.476	-10.4643	-1.77333	3.41841
GA-3	20.85	24.403	-3.55333	5.13765	0.0284063
GA-3	20.086	24.563	-4.47644	4.21453	0.0538641
GA-4	14.746	24.387	-9.64024	-0.949269	1.93089
GA-4	14.399	24.009	-9.61037	-0.919392	1.89132
GA-4	15.16	24.616	-9.45623	-0.765252	1.69967
GA-5	14.539	24.229	-9.69042	-0.999449	1.99924
GA-5	16.207	25.056	-8.84865	-0.157675	1.11549
GA-5	14.384	23.894	-9.51023	-0.819256	1.7645

## Sheet: SA
	RGL	Actin	∆Ct	∆∆Ct	2 -(∆∆Ct)
WT	18.753	27.578	-8.82552	0	1
WT	16.491	27.932	-11.4412	-2.61567	6.12907
WT	16.754	25.929	-9.17468	-0.349159	1.27382
SA-1	17.763	28.73	-10.9672	-2.14164	4.41264
SA-1	19.332	28.553	-9.22142	-0.395903	1.31577
SA-1	19.93	27.857	-7.92728	0.898237	0.536542
SA-2	17.816	28.973	-11.1579	-2.33236	5.03627
SA-2	21.797	28.61	-6.81367	2.01185	0.247955
SA-2	20.773	24.43	-3.65647	5.16905	0.0277947
SA-3	21.239	29.172	-7.93234	0.893177	0.538427
SA-3	17.564	28.597	-11.033	-2.20752	4.61881
SA-3	16.822	28.18	-11.358	-2.53252	5.78581
SA-4	20.113	28.507	-8.39308	0.432438	0.741009
SA-4	22.04	28.737	-6.69759	2.12793	0.228786
SA-4	17.783	27.942	-10.1594	-1.33392	2.52087
SA-5	17.9	28.74	-10.8394	-2.01393	4.0388
SA-5	21.975	28.886	-6.91086	1.91466	0.265235
SA-5	19.41	28.65	-9.24052	-0.414999	1.3333

## Sheet: JA
	RGL	Actin	∆Ct	∆∆Ct	2 -(∆∆Ct)
WT	18.588	27.268	-8.6794	0	1
WT	18.841	24.642	-5.80142	2.87798	0.136032
WT	19.027	26.961	-7.93374	0.745653	0.596398
JA-1	18.33	24.691	-6.36081	2.31859	0.200464
JA-1	16.76	24.659	-7.89891	0.780491	0.582169
JA-1	18.549	24.581	-6.03217	2.64722	0.159627
JA-2	19.55	25.214	-5.66323	3.01617	0.123607
JA-2	16.881	25.057	-8.17612	0.503279	0.705502
JA-2	18.683	25.076	-6.39378	2.28562	0.205098
JA-3	17.47	26.78	-9.30995	-0.630552	1.54816
JA-3	17.253	26.667	-9.41382	-0.734421	1.66373
JA-3	19.156	26.789	-7.63222	1.04718	0.483914
JA-4	16.749	26.769	-10.0204	-1.34095	2.53319
JA-4	17.481	27.092	-9.61134	-0.931942	1.90784
JA-4	19.383	26.561	-7.17863	1.50076	0.353366
JA-5	17.179	26.156	-8.97776	-0.298367	1.22975
JA-5	17.889	26.352	-8.46353	0.21587	0.861027
JA-5	18.14	25.996	-7.85685	0.822548	0.565442

## Sheet: Drought
	RGL	Actin	∆Ct	∆∆Ct	2 -(∆∆Ct)
WT	19.372	29.24	-9.86866	0	1
WT	19.82	28.757	-8.93699	0.931665	0.524253
WT	19.181	28.925	-9.74379	0.124868	0.917088
Drought-1	19.115	27.228	-8.11349	1.75516	0.29624
Drought-1	17.632	26.97	-9.33844	0.530222	0.692448
Drought-1	18.712	27.169	-8.45774	1.41092	0.376071
Drought-2	15.971	27.295	-11.3243	-1.45566	2.74282
Drought-2	17.387	27.545	-10.1576	-0.288965	1.22176
Drought-2	17.968	30.893	-12.9249	-3.05623	8.31798
Drought-3	17.122	27.414	-10.2917	-0.423025	1.34074
Drought-3	17.032	27.452	-10.4192	-0.550495	1.46459
Drought-3	17.613	27.463	-9.85003	0.0186291	0.98717
Drought-4	17.007	26.746	-9.73952	0.129133	0.914381
Drought-4	17.954	27.096	-9.14239	0.726271	0.604464
Drought-4	17.258	26.682	-9.42416	0.4445	0.734839
Drought-5	16.569	26.719	-10.1504	-0.281767	1.21568
Drought-5	16.643	27.178	-10.5345	-0.665794	1.58644
Drought-5	18.884	26.32	-7.43607	2.43259	0.185233

## Sheet: NaCl
	RGL	Actin	∆Ct	∆∆Ct	2 -(∆∆Ct)
WT	20.255	29.026	-8.77155	0	1
WT	19.613	29.313	-9.70027	-0.928722	1.90359
WT	18.752	28.914	-10.1626	-1.39107	2.62273
Salt-1	20.058	27.425	-7.36707	1.40448	0.377755
Salt-1	16.879	27.432	-10.553	-1.78149	3.4378
Salt-1	18.25	27.214	-8.96372	-0.192175	1.14248
Salt-2	22.361	26.47	-4.10928	4.66226	0.0394929
Salt-2	22.07	28.147	-6.07711	2.69444	0.154487
Salt-2	17.833	28.232	-10.399	-1.62745	3.08967
Salt-3	22.811	27.392	-4.58087	4.19068	0.0547621
Salt-3	18.759	27.763	-9.00356	-0.23201	1.17447
Salt-3	17.611	28.09	-10.4785	-1.70697	3.26475
Salt-4	19.51	27.956	-8.44649	0.32506	0.798265
Salt-4	18.901	27.213	-8.31198	0.459568	0.727204
Salt-4	17.873	27.563	-9.69007	-0.918526	1.89018
Salt-5	18.355	27.454	-9.09975	-0.328209	1.25545
Salt-5	18.202	26.97	-8.76773	0.0038147	0.997359
Salt-5	18.076	27.088	-9.01153	-0.239981	1.18098
