# Supplementary material
Source: Research Square preprint supplement (doi:10.21203/rs.3.rs-8953685/v1)
Supplement: Supplementary file 5 [file 604ed1d25991f7da1fac547b.xlsx]

## Sheet: Sheet1
	x	y	r
1	StSCL01	StSCL06	0.953548957091433
2	StSCL01	StSCL07	0.982890098364057
3	StSCL01	StSCL10	0.928533433458125
4	StSCL01	StSCL13	0.996361424297476
5	StSCL01	StSCL14	0.815246867699389
6	StSCL01	StSCL15	-0.880687
7	StSCL01	StSCL16	-0.989282
8	StSCL01	StSCL17	0.990909792599763
9	StSCL01	StSCL22	0.937496779533807
10	StSCL01	StSCL24	0.996779214510189
11	StSCL01	StSCL27	-0.938393
12	StSCL01	StSCL28	0.97289578052342
13	StSCL01	StSCL30	0.94474247777663
14	StSCL01	StSCL32	0.974862061749125
15	StSCL01	StSCL35	0.958563102148371
16	StSCL01	StSCL36	0.850578630951565
17	StSCL01	StSCL37	0.891817143926951
18	StSCL01	StSCL42	-0.810779
19	StSCL01	StSCL43	0.973630168601265
20	StSCL01	StSCL44	0.875386441620125
21	StSCL01	StSCL46	-0.942936
22	StSCL01	StSCL47	-0.971598
23	StSCL01	StSCL50	-0.901722
24	StSCL01	StSCL53	-0.865358
25	StSCL01	StSCL54	-0.975908
26	StSCL01	StSCL55	-0.983681
27	StSCL01	StSCL57	0.916096755188203
28	StSCL01	StSCL58	0.972122929515019
29	StSCL01	StSCL63	-0.824396
30	StSCL01	StSCL65	-0.942338
31	StSCL01	StSCL66	-0.983054
32	StSCL01	StSCL67	-0.880687
33	StSCL01	StSCL70	0.988620348373594
34	StSCL01	StSCL71	0.896465241189521
35	StSCL06	StSCL07	0.88174788634061
36	StSCL06	StSCL09	0.91753844101581
37	StSCL06	StSCL11	0.88886998359457
38	StSCL06	StSCL13	0.975753493953993
39	StSCL06	StSCL14	0.951828870382677
40	StSCL06	StSCL15	-0.982474
41	StSCL06	StSCL16	-0.899343
42	StSCL06	StSCL17	0.904356041467906
43	StSCL06	StSCL20	0.911023846427664
44	StSCL06	StSCL23	0.827935424077568
45	StSCL06	StSCL24	0.974635492941842
46	StSCL06	StSCL27	-0.998903
47	StSCL06	StSCL28	0.997363265867465
48	StSCL06	StSCL30	0.999608098358764
49	StSCL06	StSCL32	0.862460070440728
50	StSCL06	StSCL35	0.828220052356063
51	StSCL06	StSCL42	-0.949448
52	StSCL06	StSCL43	0.85968192771947
53	StSCL06	StSCL44	0.980349492592948
54	StSCL06	StSCL46	-0.99944
55	StSCL06	StSCL47	-0.855183
56	StSCL06	StSCL50	-0.990066
57	StSCL06	StSCL53	-0.976128
58	StSCL06	StSCL54	-0.996301
59	StSCL06	StSCL55	-0.88379
60	StSCL06	StSCL58	0.856334978272593
61	StSCL06	StSCL63	-0.956607
62	StSCL06	StSCL65	-0.999379
63	StSCL06	StSCL66	-0.992612
64	StSCL06	StSCL67	-0.982474
65	StSCL06	StSCL70	0.897382033722513
66	StSCL07	StSCL10	0.981027739079854
67	StSCL07	StSCL13	0.963615270620913
68	StSCL07	StSCL16	-0.999251
69	StSCL07	StSCL17	0.99873453707139
70	StSCL07	StSCL19	0.811060447215782
71	StSCL07	StSCL22	0.985554344913705
72	StSCL07	StSCL24	0.964953110538904
73	StSCL07	StSCL27	-0.858686
74	StSCL07	StSCL28	0.913656102477895
75	StSCL07	StSCL30	0.868197092142187
76	StSCL07	StSCL32	0.999222167343204
77	StSCL07	StSCL35	0.994635131685638
78	StSCL07	StSCL36	0.932882803165371
79	StSCL07	StSCL37	0.95988641684645
80	StSCL07	StSCL38	0.896086068305413
81	StSCL07	StSCL43	0.998991799968573
82	StSCL07	StSCL46	-0.86547
83	StSCL07	StSCL47	-0.998561
84	StSCL07	StSCL50	-0.806664
85	StSCL07	StSCL54	-0.919023
86	StSCL07	StSCL55	-0.999991
87	StSCL07	StSCL57	0.974275945582298
88	StSCL07	StSCL58	0.998678055874084
89	StSCL07	StSCL65	-0.864572
90	StSCL07	StSCL66	-0.932469
91	StSCL07	StSCL70	0.999413682433917
92	StSCL07	StSCL71	0.962745309316867
93	StSCL09	StSCL11	0.997758182334803
94	StSCL09	StSCL13	0.808257374093315
95	StSCL09	StSCL14	0.995270004705243
96	StSCL09	StSCL15	-0.975579
97	StSCL09	StSCL20	0.999870638263816
98	StSCL09	StSCL23	0.982672388904852
99	StSCL09	StSCL24	0.805272808306261
100	StSCL09	StSCL27	-0.935156
101	StSCL09	StSCL28	0.886261582565776
102	StSCL09	StSCL30	0.928310487018741
103	StSCL09	StSCL42	-0.995986
104	StSCL09	StSCL44	0.977951601693565
105	StSCL09	StSCL46	-0.93033
106	StSCL09	StSCL50	-0.964334
107	StSCL09	StSCL53	-0.982003
108	StSCL09	StSCL54	-0.879973
109	StSCL09	StSCL63	-0.993591
110	StSCL09	StSCL65	-0.930985
111	StSCL09	StSCL66	-0.862512
112	StSCL09	StSCL67	-0.975579
113	StSCL10	StSCL13	0.893513884317363
114	StSCL10	StSCL16	-0.97279
115	StSCL10	StSCL17	0.970036229188353
116	StSCL10	StSCL19	0.909077936303872
117	StSCL10	StSCL22	0.999689435427952
118	StSCL10	StSCL24	0.895770623610931
119	StSCL10	StSCL28	0.817517194444709
120	StSCL10	StSCL32	0.987909680366931
121	StSCL10	StSCL35	0.995819350668727
122	StSCL10	StSCL36	0.985011084883012
123	StSCL10	StSCL37	0.996033518397568
124	StSCL10	StSCL38	0.965139224759424
125	StSCL10	StSCL43	0.988741961443444
126	StSCL10	StSCL47	-0.990012
127	StSCL10	StSCL54	-0.825164
128	StSCL10	StSCL55	-0.980176
129	StSCL10	StSCL57	0.999481367477259
130	StSCL10	StSCL58	0.989696001227857
131	StSCL10	StSCL60	0.889118515947966
132	StSCL10	StSCL66	-0.844743
133	StSCL10	StSCL70	0.973814769084449
134	StSCL10	StSCL71	0.996903506802419
135	StSCL11	StSCL14	0.986537452100816
136	StSCL11	StSCL15	-0.958692
137	StSCL11	StSCL20	0.998705515024247
138	StSCL11	StSCL23	0.992873549973877
139	StSCL11	StSCL27	-0.909354
140	StSCL11	StSCL28	0.853277282505289
141	StSCL11	StSCL30	0.901347234439834
142	StSCL11	StSCL42	-0.987763
143	StSCL11	StSCL44	0.96178369316764
144	StSCL11	StSCL46	-0.903702
145	StSCL11	StSCL50	-0.944458
146	StSCL11	StSCL53	-0.967162
147	StSCL11	StSCL54	-0.846211
148	StSCL11	StSCL63	-0.983799
149	StSCL11	StSCL65	-0.904467
150	StSCL11	StSCL66	-0.826713
151	StSCL11	StSCL67	-0.958692
152	StSCL13	StSCL14	0.861637563285934
153	StSCL13	StSCL15	-0.917855
154	StSCL13	StSCL16	-0.973238
155	StSCL13	StSCL17	0.975838660804356
156	StSCL13	StSCL22	0.90442659372927
157	StSCL13	StSCL24	0.999987242951585
158	StSCL13	StSCL27	-0.964431
159	StSCL13	StSCL28	0.989064427464833
160	StSCL13	StSCL30	0.969244037193634
161	StSCL13	StSCL32	0.95232523487322
162	StSCL13	StSCL35	0.930795353002071
163	StSCL13	StSCL36	0.802666464048759
164	StSCL13	StSCL37	0.850015123686415
165	StSCL13	StSCL42	-0.857717
166	StSCL13	StSCL43	0.950644157397252
167	StSCL13	StSCL44	0.913402810202052
168	StSCL13	StSCL46	-0.967884
169	StSCL13	StSCL47	-0.947895
170	StSCL13	StSCL50	-0.935287
171	StSCL13	StSCL53	-0.904922
172	StSCL13	StSCL54	-0.990953
173	StSCL13	StSCL55	-0.964768
174	StSCL13	StSCL57	0.878590445624445
175	StSCL13	StSCL58	0.948602089001281
176	StSCL13	StSCL63	-0.869637
177	StSCL13	StSCL65	-0.967432
178	StSCL13	StSCL66	-0.995101
179	StSCL13	StSCL67	-0.917855
180	StSCL13	StSCL70	0.972202065770516
181	StSCL13	StSCL71	0.855437398881033
182	StSCL14	StSCL15	-0.992303
183	StSCL14	StSCL20	0.993578700755166
184	StSCL14	StSCL23	0.960017989488856
185	StSCL14	StSCL24	0.85906300014397
186	StSCL14	StSCL27	-0.965146
187	StSCL14	StSCL28	0.92706679550146
188	StSCL14	StSCL30	0.960039561674168
189	StSCL14	StSCL42	-0.999971
190	StSCL14	StSCL44	0.993613349051164
191	StSCL14	StSCL46	-0.961556
192	StSCL14	StSCL50	-0.985486
193	StSCL14	StSCL53	-0.995706
194	StSCL14	StSCL54	-0.921958
195	StSCL14	StSCL63	-0.999872
196	StSCL14	StSCL65	-0.962046
197	StSCL14	StSCL66	-0.907592
198	StSCL14	StSCL67	-0.992303
199	StSCL15	StSCL16	0.802080067081553
200	StSCL15	StSCL17	-0.808956
201	StSCL15	StSCL20	-0.97192
202	StSCL15	StSCL23	-0.917962
203	StSCL15	StSCL24	-0.915839
204	StSCL15	StSCL27	0.99012648158532
205	StSCL15	StSCL28	-0.966357
206	StSCL15	StSCL30	-0.987307
207	StSCL15	StSCL42	0.991323073398703
208	StSCL15	StSCL44	-0.999939
209	StSCL15	StSCL46	0.988160979022327
210	StSCL15	StSCL50	0.99892252586861
211	StSCL15	StSCL53	0.999505581387943
212	StSCL15	StSCL54	0.962822045856788
213	StSCL15	StSCL63	0.994154632153349
214	StSCL15	StSCL65	0.988434043645593
215	StSCL15	StSCL66	0.952599235604774
216	StSCL15	StSCL67	1
217	StSCL16	StSCL17	-0.999933
218	StSCL16	StSCL22	-0.978262
219	StSCL16	StSCL24	-0.974386
220	StSCL16	StSCL27	0.87787664716328
221	StSCL16	StSCL28	-0.928703
222	StSCL16	StSCL30	-0.886751
223	StSCL16	StSCL32	-0.996947
224	StSCL16	StSCL35	-0.989887
225	StSCL16	StSCL36	-0.918245
226	StSCL16	StSCL37	-0.948316
227	StSCL16	StSCL38	-0.878236
228	StSCL16	StSCL43	-0.996506
229	StSCL16	StSCL46	0.884209538547147
230	StSCL16	StSCL47	0.995737645156823
231	StSCL16	StSCL50	0.828932016537437
232	StSCL16	StSCL54	0.933590327484914
233	StSCL16	StSCL55	0.999409634202258
234	StSCL16	StSCL57	-0.964825
235	StSCL16	StSCL58	-0.995941
236	StSCL16	StSCL65	0.883371953320644
237	StSCL16	StSCL66	0.945750864737963
238	StSCL16	StSCL67	0.802080067081553
239	StSCL16	StSCL70	-0.99999
240	StSCL16	StSCL71	-0.951559
241	StSCL17	StSCL22	0.975789669496372
242	StSCL17	StSCL24	0.976929845688029
243	StSCL17	StSCL27	-0.883374
244	StSCL17	StSCL28	0.93294315944701
245	StSCL17	StSCL30	0.892054486235727
246	StSCL17	StSCL32	0.995974445926524
247	StSCL17	StSCL35	0.988173940449507
248	StSCL17	StSCL36	0.913587958629325
249	StSCL17	StSCL37	0.944570276552238
250	StSCL17	StSCL38	0.872628301459338
251	StSCL17	StSCL43	0.995469835426986
252	StSCL17	StSCL44	0.802394959049313
253	StSCL17	StSCL46	-0.88957
254	StSCL17	StSCL47	-0.9946
255	StSCL17	StSCL50	-0.835366
256	StSCL17	StSCL54	-0.937685
257	StSCL17	StSCL55	-0.998944
258	StSCL17	StSCL57	0.961709225985157
259	StSCL17	StSCL58	0.994829148577497
260	StSCL17	StSCL65	-0.88875
261	StSCL17	StSCL66	-0.949457
262	StSCL17	StSCL67	-0.808956
263	StSCL17	StSCL70	0.999870909557633
264	StSCL17	StSCL71	0.947927434901464
265	StSCL19	StSCL22	0.898413066741555
266	StSCL19	StSCL25	0.974967570124045
267	StSCL19	StSCL29	-0.828326
268	StSCL19	StSCL32	0.833497131073937
269	StSCL19	StSCL35	0.867220890416172
270	StSCL19	StSCL36	0.967316117818305
271	StSCL19	StSCL37	0.942542993574485
272	StSCL19	StSCL38	0.986433255410922
273	StSCL19	StSCL40	0.973004253590866
274	StSCL19	StSCL43	0.836503464812599
275	StSCL19	StSCL47	-0.841263
276	StSCL19	StSCL55	-0.80851
277	StSCL19	StSCL57	0.92202282888949
278	StSCL19	StSCL58	0.840056363721087
279	StSCL19	StSCL60	0.998958221233618
280	StSCL19	StSCL61	0.889942121025084
281	StSCL19	StSCL68	-0.869707
282	StSCL19	StSCL71	0.939024203434624
283	StSCL20	StSCL23	0.985526520749867
284	StSCL20	StSCL27	-0.929338
285	StSCL20	StSCL28	0.87869689738897
286	StSCL20	StSCL30	0.922210137777318
287	StSCL20	StSCL42	-0.994418
288	StSCL20	StSCL44	0.974466167822715
289	StSCL20	StSCL46	-0.924311
290	StSCL20	StSCL50	-0.959952
291	StSCL20	StSCL53	-0.978838
292	StSCL20	StSCL54	-0.872219
293	StSCL20	StSCL63	-0.991644
294	StSCL20	StSCL65	-0.924993
295	StSCL20	StSCL66	-0.854261
296	StSCL20	StSCL67	-0.97192
297	StSCL21	StSCL23	0.802506056036449
298	StSCL21	StSCL25	-0.843729
299	StSCL21	StSCL29	0.980825971361003
300	StSCL21	StSCL40	-0.848349
301	StSCL21	StSCL48	1
302	StSCL21	StSCL52	0.99690512845194
303	StSCL21	StSCL59	1
304	StSCL21	StSCL61	-0.950098
305	StSCL21	StSCL68	0.962523743761118
306	StSCL22	StSCL24	0.906570016671655
307	StSCL22	StSCL28	0.831615138820169
308	StSCL22	StSCL32	0.991466313070687
309	StSCL22	StSCL35	0.997786438017885
310	StSCL22	StSCL36	0.980406607348376
311	StSCL22	StSCL37	0.993506786563552
312	StSCL22	StSCL38	0.958316861651794
313	StSCL22	StSCL43	0.992163768144415
314	StSCL22	StSCL47	-0.993218
315	StSCL22	StSCL54	-0.838985
316	StSCL22	StSCL55	-0.984809
317	StSCL22	StSCL57	0.998368462597068
318	StSCL22	StSCL58	0.99295687208923
319	StSCL22	StSCL60	0.877436834176009
320	StSCL22	StSCL66	-0.857817
321	StSCL22	StSCL70	0.979177841794914
322	StSCL22	StSCL71	0.994634288522546
323	StSCL23	StSCL27	-0.853295
324	StSCL23	StSCL30	0.843310502626339
325	StSCL23	StSCL42	-0.962138
326	StSCL23	StSCL44	0.922298888178302
327	StSCL23	StSCL46	-0.846237
328	StSCL23	StSCL48	0.802506056036449
329	StSCL23	StSCL50	-0.898564
330	StSCL23	StSCL52	0.846926986824053
331	StSCL23	StSCL53	-0.92998
332	StSCL23	StSCL59	0.802506056036449
333	StSCL23	StSCL63	-0.955423
334	StSCL23	StSCL65	-0.847189
335	StSCL23	StSCL67	-0.917962
336	StSCL24	StSCL27	-0.963084
337	StSCL24	StSCL28	0.988306848295259
338	StSCL24	StSCL30	0.967988580854978
339	StSCL24	StSCL32	0.953854108868337
340	StSCL24	StSCL35	0.932629873165164
341	StSCL24	StSCL36	0.805668861724478
342	StSCL24	StSCL37	0.85266500560516
343	StSCL24	StSCL42	-0.855109
344	StSCL24	StSCL43	0.95219931154969
345	StSCL24	StSCL44	0.911335059844516
346	StSCL24	StSCL46	-0.966601
347	StSCL24	StSCL47	-0.949492
348	StSCL24	StSCL50	-0.933487
349	StSCL24	StSCL53	-0.90276
350	StSCL24	StSCL54	-0.990262
351	StSCL24	StSCL55	-0.966085
352	StSCL24	StSCL57	0.880991536764445
353	StSCL24	StSCL58	0.950188525880983
354	StSCL24	StSCL63	-0.867132
355	StSCL24	StSCL65	-0.966141
356	StSCL24	StSCL66	-0.994589
357	StSCL24	StSCL67	-0.915839
358	StSCL24	StSCL70	0.973372352677468
359	StSCL24	StSCL71	0.858042498704323
360	StSCL25	StSCL29	-0.93216
361	StSCL25	StSCL36	0.886720506459499
362	StSCL25	StSCL37	0.844666045302068
363	StSCL25	StSCL38	0.925239304786834
364	StSCL25	StSCL40	0.999962455300272
365	StSCL25	StSCL48	-0.843729
366	StSCL25	StSCL57	0.812863895385615
367	StSCL25	StSCL59	-0.843729
368	StSCL25	StSCL60	0.984098482646033
369	StSCL25	StSCL61	0.969071327894156
370	StSCL25	StSCL68	-0.95768
371	StSCL25	StSCL71	0.839063858512822
372	StSCL27	StSCL28	-0.99287
373	StSCL27	StSCL30	-0.999822
374	StSCL27	StSCL32	-0.837808
375	StSCL27	StSCL35	-0.801063
376	StSCL27	StSCL42	0.963109266338242
377	StSCL27	StSCL43	-0.834812
378	StSCL27	StSCL44	-0.988513
379	StSCL27	StSCL46	0.999910370040631
380	StSCL27	StSCL47	0.829966654345329
381	StSCL27	StSCL50	0.995565101508197
382	StSCL27	StSCL53	0.985229518662887
383	StSCL27	StSCL54	0.991182484091258
384	StSCL27	StSCL55	0.860905406197678
385	StSCL27	StSCL58	-0.831207
386	StSCL27	StSCL63	0.969204552129187
387	StSCL27	StSCL65	0.999932735444559
388	StSCL27	StSCL66	0.985839458206933
389	StSCL27	StSCL67	0.99012648158532
390	StSCL27	StSCL70	-0.87573
391	StSCL28	StSCL30	0.994940870165824
392	StSCL28	StSCL32	0.896915878827618
393	StSCL28	StSCL35	0.866705132014516
394	StSCL28	StSCL42	-0.924162
395	StSCL28	StSCL43	0.894486477083128
396	StSCL28	StSCL44	0.96344864364058
397	StSCL28	StSCL46	-0.994377
398	StSCL28	StSCL47	-0.890543
399	StSCL28	StSCL50	-0.977252
400	StSCL28	StSCL53	-0.957792
401	StSCL28	StSCL54	-0.99991
402	StSCL28	StSCL55	-0.915414
403	StSCL28	StSCL58	0.891554100353731
404	StSCL28	StSCL63	-0.932939
405	StSCL28	StSCL65	-0.994185
406	StSCL28	StSCL66	-0.9988
407	StSCL28	StSCL67	-0.966357
408	StSCL28	StSCL70	0.927038048438982
409	StSCL29	StSCL40	-0.935262
410	StSCL29	StSCL48	0.980825971361003
411	StSCL29	StSCL52	0.962469696221321
412	StSCL29	StSCL59	0.980825971361003
413	StSCL29	StSCL60	-0.853029
414	StSCL29	StSCL61	-0.992676
415	StSCL29	StSCL68	0.996920770296155
416	StSCL30	StSCL32	0.847953734232798
417	StSCL30	StSCL35	0.812207692953965
418	StSCL30	StSCL42	-0.957864
419	StSCL30	StSCL43	0.845044981160087
420	StSCL30	StSCL44	0.985487576679828
421	StSCL30	StSCL46	-0.999985
422	StSCL30	StSCL47	-0.840338
423	StSCL30	StSCL50	-0.993614
424	StSCL30	StSCL53	-0.981825
425	StSCL30	StSCL54	-0.993505
426	StSCL30	StSCL55	-0.870346
427	StSCL30	StSCL58	0.841542828608851
428	StSCL30	StSCL63	-0.964389
429	StSCL30	StSCL65	-0.999974
430	StSCL30	StSCL66	-0.988826
431	StSCL30	StSCL67	-0.987307
432	StSCL30	StSCL70	0.88467798430794
433	StSCL32	StSCL35	0.99794076481723
434	StSCL32	StSCL36	0.94636060797419
435	StSCL32	StSCL37	0.970196721843401
436	StSCL32	StSCL38	0.912893152903136
437	StSCL32	StSCL43	0.999985074374162
438	StSCL32	StSCL46	-0.845042
439	StSCL32	StSCL47	-0.999899
440	StSCL32	StSCL54	-0.902763
441	StSCL32	StSCL55	-0.999041
442	StSCL32	StSCL57	0.982404959713533
443	StSCL32	StSCL58	0.999928241381556
444	StSCL32	StSCL60	0.807414878880993
445	StSCL32	StSCL65	-0.844084
446	StSCL32	StSCL66	-0.917498
447	StSCL32	StSCL70	0.997286126679952
448	StSCL32	StSCL71	0.972659863663602
449	StSCL35	StSCL36	0.965136987168828
450	StSCL35	StSCL37	0.983741724267975
451	StSCL35	StSCL38	0.93719607275949
452	StSCL35	StSCL43	0.998276318205591
453	StSCL35	StSCL46	-0.809005
454	StSCL35	StSCL47	-0.998751
455	StSCL35	StSCL54	-0.873314
456	StSCL35	StSCL55	-0.994176
457	StSCL35	StSCL57	0.992361371556567
458	StSCL35	StSCL58	0.99863755602552
459	StSCL35	StSCL60	0.843595135771156
460	StSCL35	StSCL65	-0.807952
461	StSCL35	StSCL66	-0.890096
462	StSCL35	StSCL70	0.990510118742307
463	StSCL35	StSCL71	0.985552964519541
464	StSCL36	StSCL37	0.99645210653616
465	StSCL36	StSCL38	0.995820131524539
466	StSCL36	StSCL40	0.882681180413444
467	StSCL36	StSCL43	0.948111842734506
468	StSCL36	StSCL47	-0.950856
469	StSCL36	StSCL55	-0.931308
470	StSCL36	StSCL57	0.990054855935645
471	StSCL36	StSCL58	0.950163472464795
472	StSCL36	StSCL60	0.954736786035955
473	StSCL36	StSCL70	0.920003725918576
474	StSCL36	StSCL71	0.995524767149814
475	StSCL37	StSCL38	0.984600070268245
476	StSCL37	StSCL40	0.839995835189348
477	StSCL37	StSCL43	0.971506175449944
478	StSCL37	StSCL47	-0.973541
479	StSCL37	StSCL55	-0.958659
480	StSCL37	StSCL57	0.998382276614149
481	StSCL37	StSCL58	0.973029995047202
482	StSCL37	StSCL60	0.926315405398201
483	StSCL37	StSCL70	0.949723447710532
484	StSCL37	StSCL71	0.999946119982664
485	StSCL38	StSCL40	0.921917078287125
486	StSCL38	StSCL43	0.91510976511746
487	StSCL38	StSCL47	-0.9186
488	StSCL38	StSCL55	-0.894148
489	StSCL38	StSCL57	0.973067239042838
490	StSCL38	StSCL58	0.917717722478791
491	StSCL38	StSCL60	0.977914185424098
492	StSCL38	StSCL61	0.802998192998078
493	StSCL38	StSCL70	0.880362773370004
494	StSCL38	StSCL71	0.982732261320705
495	StSCL40	StSCL48	-0.848349
496	StSCL40	StSCL52	-0.804102
497	StSCL40	StSCL57	0.80778622178031
498	StSCL40	StSCL59	-0.848349
499	StSCL40	StSCL60	0.982522366575112
500	StSCL40	StSCL61	0.971173382093048
501	StSCL40	StSCL68	-0.960138
502	StSCL40	StSCL71	0.834318129704991
503	StSCL42	StSCL44	-0.992718
504	StSCL42	StSCL46	0.95941995545022
505	StSCL42	StSCL50	0.984154591701129
506	StSCL42	StSCL53	0.994965917560365
507	StSCL42	StSCL54	0.918958824902109
508	StSCL42	StSCL63	0.9997202803328
509	StSCL42	StSCL65	0.959923210510872
510	StSCL42	StSCL66	0.904343449949347
511	StSCL42	StSCL67	0.991323073398703
512	StSCL43	StSCL46	-0.842108
513	StSCL43	StSCL47	-0.999962
514	StSCL43	StSCL54	-0.900399
515	StSCL43	StSCL55	-0.998787
516	StSCL43	StSCL57	0.983410697933732
517	StSCL43	StSCL58	0.999978768973206
518	StSCL43	StSCL60	0.810626270334171
519	StSCL43	StSCL65	-0.841141
520	StSCL43	StSCL66	-0.915311
521	StSCL43	StSCL70	0.996868992923628
522	StSCL43	StSCL71	0.973914183866583
523	StSCL44	StSCL46	-0.986401
524	StSCL44	StSCL50	-0.998347
525	StSCL44	StSCL53	-0.999793
526	StSCL44	StSCL54	-0.959771
527	StSCL44	StSCL63	-0.995289
528	StSCL44	StSCL65	-0.986694
529	StSCL44	StSCL66	-0.949171
530	StSCL44	StSCL67	-0.999939
531	StSCL46	StSCL47	0.837360542954847
532	StSCL46	StSCL50	0.994216344437304
533	StSCL46	StSCL53	0.982848579513511
534	StSCL46	StSCL54	0.992867672663477
535	StSCL46	StSCL55	0.867639843331317
536	StSCL46	StSCL58	-0.838576
537	StSCL46	StSCL63	0.965820670243637
538	StSCL46	StSCL65	0.999998397655514
539	StSCL46	StSCL66	0.987996239738423
540	StSCL46	StSCL67	0.988160979022327
541	StSCL46	StSCL70	-0.882115
542	StSCL47	StSCL54	0.896560808691483
543	StSCL47	StSCL55	0.998318545954657
544	StSCL47	StSCL57	-0.984959
545	StSCL47	StSCL58	-0.999998
546	StSCL47	StSCL60	-0.815715
547	StSCL47	StSCL65	0.836380606378574
548	StSCL47	StSCL66	0.911754582354588
549	StSCL47	StSCL70	-0.99614
550	StSCL47	StSCL71	-0.975861
551	StSCL48	StSCL52	0.99690512845194
552	StSCL48	StSCL59	1
553	StSCL48	StSCL61	-0.950098
554	StSCL48	StSCL68	0.962523743761118
555	StSCL50	StSCL53	0.996969455764442
556	StSCL50	StSCL54	0.974321369874391
557	StSCL50	StSCL55	0.809225243240188
558	StSCL50	StSCL63	0.98807289072744
559	StSCL50	StSCL65	0.99440700745453
560	StSCL50	StSCL66	0.965691727255342
561	StSCL50	StSCL67	0.99892252586861
562	StSCL50	StSCL70	-0.826426
563	StSCL52	StSCL59	0.99690512845194
564	StSCL52	StSCL61	-0.922634
565	StSCL52	StSCL68	0.938224935459043
566	StSCL53	StSCL54	0.953852406392039
567	StSCL53	StSCL63	0.997057746184046
568	StSCL53	StSCL65	0.983177136627552
569	StSCL53	StSCL66	0.942562746866013
570	StSCL53	StSCL67	0.999505581387943
571	StSCL54	StSCL55	0.920727712558429
572	StSCL54	StSCL57	-0.806545
573	StSCL54	StSCL58	-0.897545
574	StSCL54	StSCL63	0.928028555916783
575	StSCL54	StSCL65	0.992652655595778
576	StSCL54	StSCL66	0.999366629448302
577	StSCL54	StSCL67	0.962822045856788
578	StSCL54	StSCL70	-0.931981
579	StSCL55	StSCL57	-0.973287
580	StSCL55	StSCL58	-0.998445
581	StSCL55	StSCL65	0.866748395765236
582	StSCL55	StSCL66	0.934030281797987
583	StSCL55	StSCL70	-0.999553
584	StSCL55	StSCL71	-0.961561
585	StSCL57	StSCL58	0.984571822104774
586	StSCL57	StSCL60	0.903395699647937
587	StSCL57	StSCL66	-0.827071
588	StSCL57	StSCL70	0.965988724681779
589	StSCL57	StSCL71	0.998918704447387
590	StSCL58	StSCL60	0.814424744484683
591	StSCL58	StSCL65	-0.837599
592	StSCL58	StSCL66	-0.912667
593	StSCL58	StSCL70	0.996332581927318
594	StSCL58	StSCL71	0.975372153783159
595	StSCL59	StSCL61	-0.950098
596	StSCL59	StSCL68	0.962523743761118
597	StSCL60	StSCL61	0.909827506848541
598	StSCL60	StSCL68	-0.891325
599	StSCL60	StSCL71	0.922354610384811
600	StSCL61	StSCL68	-0.999092
601	StSCL63	StSCL65	0.96628315312532
602	StSCL63	StSCL66	0.91418478530793
603	StSCL63	StSCL67	0.994154632153349
604	StSCL65	StSCL66	0.987718115834454
605	StSCL65	StSCL67	0.988434043645593
606	StSCL65	StSCL70	-0.881271
607	StSCL66	StSCL67	0.952599235604774
608	StSCL66	StSCL70	-0.944291
609	StSCL66	StSCL71	-0.800044
610	StSCL70	StSCL71	0.952922343210328
