# Supplementary material
Source: Research Square preprint supplement (doi:10.21203/rs.3.rs-8953685/v1)
Supplement: Supplementary file 6 [file 6e9d8e56ceee8c16afe0eb3e.xlsx]

## Sheet: Sheet1
Gene	Primer name	Primer sequence
StSCL3	StSCL3-F	GTTGGCCATACCTAGACGGG
	StSCL3-R	TGGAACTTCCTGATGCACCC
StActin	StActin-F	TATAACGAGCTTCGTGTTGCAC
	StActin-R	ACTGGCATACAGCGAAAGAACA
pCAMBIA1300-GFP-StSCL3	pCAMBIA1300-GFP-StSCL3-F	TGTAAAACGACGGCCAGT
	pCAMBIA1300-GFP-StSCL3-R	CAGGAAACAGCTATGACC
