# Supplementary material
Source: Research Square preprint supplement (doi:10.21203/rs.3.rs-8953685/v1)
Supplement: Supplementary file 8 [file adbae2dee18e6bd2500dc519.xlsx]

## Sheet: Different tissues or developmen
	StSCL01	StSCL04	StSCL06	StSCL07	StSCL09	StSCL10	StSCL11	StSCL13	StSCL14	StSCL15	StSCL16	StSCL17	StSCL19	StSCL20	StSCL21	StSCL22	StSCL23	StSCL24	StSCL25	StSCL27	StSCL28	StSCL29	StSCL30	StSCL32	StSCL34	StSCL35	StSCL36	StSCL37	StSCL38	StSCL40	StSCL42	StSCL43	StSCL44	StSCL46	StSCL47	StSCL48	StSCL50	StSCL51	StSCL52	StSCL53	StSCL54	StSCL55	StSCL57	StSCL58	StSCL59	StSCL60	StSCL61	StSCL63	StSCL65
Roots	-0.49857	1.16441	-0.427684	0.0542023	1.10393	0.164119	0.388882	1.3885	-0.77083	-0.0088799	-0.962798	-1.05032	-7.60338e-06	0.185931	0.0551795	-0.657007	0.181815	0.0761589	-1.04927	1.10488	0.290102	0.0898486	-0.578154	-1.50933	0	-1.52383	-0.374571	0.213632	0.0392459	-0.374446	-0.253096	1.13297	0.900642	-0.660742	0.0673592	0.0147925	-1.14935	0.0531844	0.839221	-0.332459	0.279165	-1.69066	0.505886	-0.676877	0.369635	0.680918	-0.0175201	0.778299	-1.49692
tubers	-0.101527	-0.361887	-0.220066	0	1.3437	0.0767475	1.19423	0.276623	-1.16762	-0.0088799	1.1978	-0.953061	0.0310963	-0.116243	-0.0260714	0.767668	0.201872	0.0804706	-0.941104	1.60565	-0.0369676	0.228524	-0.582549	-1.5726	0	-1.65497	-0.797229	0.10088	0.000193522	0.252914	1.98935	-0.0221313	-0.559293	1.97424	0.000156318	0.0133372	-1.13042	0.0371072	0.158561	-0.361764	1.42426	-1.72629	-0.413538	-0.636778	0.552349	0.0604735	-0.0365857	0.174961	-0.962412
Stolons	-0.317367	-0.357114	0.0715101	0.0643359	-0.316035	0.0320593	0.717496	-0.186448	-1.1254	-0.0088799	1.68289	-0.925438	0.0830851	-0.11556	-0.0260714	1.69277	0.843316	0.203891	1.3341	2.36857	0.0773287	0.474279	0.0277491	-1.56736	0.0156038	-1.27734	-0.518236	-0.0164692	0.431903	0.865002	2.22365	-0.126071	0.856088	2.84679	0.0775289	-0.0131563	0.729578	-0.036617	-0.211721	0.738654	2.20246	1.26777	-0.314858	-0.714476	0	0.238464	-0.0365857	1.03172	2.34955
Leaves	-0.544913	-0.369921	-0.309306	0	0.284379	0.0458806	-0.822011	-1.07368	-0.770049	-0.0088799	-0.670635	-1.13625	0.118653	-0.0942146	-0.0260714	-0.631324	0.480903	0.0137361	0.232895	-0.269833	-0.0369676	-0.0941629	-0.567986	-1.55851	0	-1.3739	-0.79617	-0.241152	0.0742187	-0.376339	-0.934475	0.872056	-0.0503217	-0.857061	0.00359063	-0.0131563	1.82252	-0.036617	-0.526218	-0.495601	-1.38725	-1.8192	0.196334	-0.515939	0	0.255283	-0.0365857	-0.667041	-1.61653
Whole Mature Flowers	-0.161784	-0.369921	-0.41123	0	0.483269	0.291756	-0.720388	-0.703618	-1.07581	-0.0088799	-0.0299111	-1.16516	0.0206368	-0.0813426	-0.0260714	1.41279	0.822628	0.43799	1.22326	1.12596	-0.00101939	-0.0657838	-0.555716	-1.60469	0.0189571	-1.17732	-0.786959	-0.229668	-0.0268857	-0.456412	-0.818562	-0.016723	-0.427773	-0.810532	-0.0218406	-0.0131563	1.60295	-0.036617	-0.223903	-0.180028	-1.42393	-1.81973	0.379101	0.553956	0	0.255599	-0.0365857	-0.714634	-0.71541
Mature Whole Fruit	0.302902	-0.341798	-0.254415	0.128576	0.412931	0.455079	-0.737377	-0.886022	-1.17939	-0.0088799	-0.982375	-1.0271	0.13188	-0.110237	-0.00827727	1.03032	-0.603351	0.108348	-0.723784	0.258628	0.0629789	-0.0941629	-0.582549	-1.56102	0	-1.57954	-0.792473	-0.199805	0.222659	-0.446288	-0.702244	-0.0937249	-0.610964	0.192567	0.00838472	-0.0131563	-0.662994	-0.036617	0.0436098	0.717774	-1.37331	-1.73022	-0.277864	-0.750312	0.819142	0.702934	-0.0365857	0.347119	1.25668
[truncated: 6 more columns]

## Sheet: Tuber development
	StSCL01	StSCL04	StSCL06	StSCL07	StSCL09	StSCL10	StSCL11	StSCL13	StSCL14	StSCL15	StSCL16	StSCL17	StSCL19	StSCL20	StSCL21	StSCL22	StSCL23	StSCL24	StSCL25	StSCL27	StSCL28	StSCL29	StSCL30	StSCL32	StSCL34	StSCL35	StSCL36	StSCL37	StSCL38	StSCL40	StSCL42	StSCL43	StSCL44	StSCL46	StSCL47	StSCL48	StSCL50	StSCL51	StSCL52	StSCL53	StSCL54	StSCL55	StSCL57	StSCL58	StSCL59	StSCL60	StSCL61	StSCL63	StSCL65
Stolon	-0.0212141	-0.567546	1.25178	0	-0.315907	-0.0906333	-0.751425	-1.33036	-0.785999	0.0887479	-0.939627	-0.843706	1.08078e-05	-0.19864	0	-0.690302	0.908624	0.238951	-1.08033	-0.799132	0.0416279	-1.0919	-0.565253	-1.01296	0	-1.16969	1.09571	-0.572488	-0.129305	-0.434995	-1.03066	-0.427713	0.470491	-1.19756	0	0	-0.667163	0	0.160844	-0.332421	-1.47683	-1.52137	-0.695386	0.492034	-0.0101977	-0.433745	0	-0.922686	-1.06198
Tuber Pith	-0.600884	-0.567546	0.386763	0	0.709093	-0.211413	-0.52136	-1.0074	-1.13887	0	-1.02552	-0.316671	0.174161	-0.327418	0	-1.36813	-0.509186	-0.354683	-1.33887	-0.692288	-0.142103	-0.725361	-0.650287	-1.21392	0	-1.98458	-0.771145	-0.538928	-0.146555	-0.343812	-1.22046	-0.446988	-1.02496	-1.18597	0	0	-1.42049	0	0.595812	-0.418184	-1.48685	-1.67655	-1.17213	-0.490211	1.07148	-0.471746	0	-0.772333	-0.684127
Tuber Peel	-0.636754	-0.567546	0.401755	0	0.0217597	-0.211413	0.471277	-1.31228	-1.14266	0	-1.05994	0.395396	0.263534	-0.195582	0.0480956	-1.20822	-0.259701	-0.241698	-1.34219	0.680027	0.136664	-0.662067	-0.636761	-1.14752	0	-1.97099	-0.754677	-0.434411	-0.0548328	-0.210426	-1.13009	-0.472705	-1.0052	0.894244	0	0	-1.4561	0	0.814031	-0.409026	-1.32666	-1.64804	-1.15906	-0.871314	0.811047	-0.354135	0	-0.72689	-0.319543
Tuber Cortex	-0.551876	-0.567546	0.729007	0.0330823	0.828267	-0.211413	-0.23935	-0.979603	-1.12221	0	-1.00015	-0.00753442	0.150234	-0.318257	0	-1.36778	-0.437904	-0.254277	-1.30432	-0.50105	-0.142103	-0.790581	-0.650287	-1.1596	0	-1.96108	-0.771145	-0.5319	-0.155317	-0.371997	-1.20058	-0.397427	-0.972081	-1.1654	0	0	-1.3484	0	0.429886	-0.448332	-1.46698	-1.67102	-1.17213	0.33678	1.22298	-0.455392	0.056566	-0.822192	-0.873297
Young Tuber	-0.419488	-0.567546	0.90405	0	0.552568	-0.211413	-0.780613	-1.30512	-1.11072	0.0490404	-0.833486	-0.323471	0.0543982	-0.287809	0	-1.225	0.957703	0.273517	-1.16004	0.383402	0.426506	-0.974028	-0.0053693	-1.23102	0	1.41799	0.240062	-0.259245	-0.0210114	0.229157	-1.11398	-0.516259	-0.616423	-1.14087	0	0	-1.42067	0	0.393447	-0.447566	-1.33783	-1.64008	-1.16884	0.916127	0.699786	-0.481184	0.0519844	-0.79615	-1.11428
Mature Tuber	-0.737807	-0.567546	0.658113	0	0.939414	-0.171079	-0.705291	-1.10775	-1.16235	0	-1.11162	-0.137386	0.140385	-0.296705	0	-1.37229	0.28026	-0.026811	-1.36488	-0.705744	-0.142103	-0.913761	-0.650287	-1.13243	0	-1.91331	-0.760752	-0.370008	-0.125677	-0.451215	-1.22856	-0.493738	-0.962747	-1.19994	0	0	-1.36476	0	0.501577	-0.468448	-1.46744	-1.67649	-1.17213	0.842116	1.32761	-0.544479	0	-0.731008	-1.22403
Tuber Sprout	0.735668	-0.551441	0.0867655	0	-0.46012	-0.211413	0.997325	0.682795	-0.902117	0	-0.743086	-0.525047	0.096575	-0.175506	0.0404164	-0.788536	-0.58904	0.0390372	-0.819221	0.345099	0.0693865	-0.925672	-0.557946	-0.865732	0	-1.72224	0.499436	-0.436506	0.0247598	-0.190082	-0.653048	-0.516259	0.229874	-0.932484	0	0	-1.26916	0	-0.131243	0.0759191	-1.37178	-1.47987	-1.10457	-0.515953	-0.155728	0.269865	0	-0.0564169	0.965874
[truncated: 6 more columns]

## Sheet: Abiotic  and hormone
	StSCL01	StSCL04	StSCL06	StSCL07	StSCL09	StSCL10	StSCL11	StSCL13	StSCL14	StSCL15	StSCL16	StSCL17	StSCL19	StSCL20	StSCL21	StSCL22	StSCL23	StSCL24	StSCL25	StSCL27	StSCL28	StSCL29	StSCL30	StSCL32	StSCL34	StSCL35	StSCL36	StSCL37	StSCL38	StSCL40	StSCL42	StSCL43	StSCL44	StSCL46	StSCL47	StSCL48	StSCL50	StSCL51	StSCL52	StSCL53	StSCL54	StSCL55	StSCL57	StSCL58	StSCL59	StSCL60	StSCL61	StSCL63	StSCL65
Mannitol	0.123283	-0.0340032	-0.525051	-0.0256105	-0.362631	0.0359442	0.473604	0.634343	0.831934	-0.00113121	0.323788	0.694597	-0.0835921	0.00282284	0	0.977088	0.771492	0.2373	0.769082	-0.609637	0.204872	0.0165424	-0.507965	1.2306	0	0.956936	0.433368	0.308846	0.0887851	0.328223	0.912729	0.40771	0.45617	1.57959	-0.0263895	0	-1.01654	0.0268735	-0.337206	0.311828	-0.0377053	0.0578182	0.567126	1.09886	-0.0517389	0.548402	0	-0.247519	1.14064
NaCl	0.229124	-0.0837401	-0.713759	-0.0256105	0.527821	0.268795	0.618843	0.678989	0.641315	0.0207249	-0.273672	0.518635	-0.0977098	0.19328	0	-0.647393	-0.711495	0.283887	0.635403	-0.687386	0.15331	0.0393518	-0.185375	0.934205	0	1.48103	0.0655312	0.415112	-0.00615486	0.386001	0.437394	0.0509351	0.481731	1.00321	-0.0263895	0.030903	-0.802589	0.0291341	-0.234186	0.225069	-1.12599	0.657524	0.430119	0.976824	-0.0499282	0.595121	0.0222986	-0.25635	0.551743
Water-Stress	0.997935	-0.210002	-0.921658	-0.0256105	-0.418757	-0.0104361	-0.670863	0.321323	0.993485	0.0320781	1.30423	-0.411539	0.0856587	-0.0124192	0	0.0750723	-1.19152	-0.225422	-0.503178	-0.93046	0.204829	0.149361	-0.713205	0.181838	0.0831646	-1.58227	-0.747876	-0.415148	0.168467	0.157901	0.337056	-0.0394022	-1.00198	0.54522	-0.0263895	0	0.815232	-0.0298859	0.073227	0.0727056	-1.69665	1.55256	-0.698894	-0.156891	-0.0936101	0.619566	0	0.536787	0.923803
Heat	-0.456732	1.16589	-0.475801	0	1.20633	0.0481212	0.334816	1.47871	-0.734312	0	-1.02614	-1.10055	-1.03507e-06	0.178231	0.0591278	-0.673446	-0.595237	0.0389419	-1.06116	1.04241	0.35351	0.143238	-0.579565	-1.57402	0	-1.58823	-0.219346	0.329575	0.101451	-0.427001	-0.0588813	1.12608	0.908458	-0.709092	0	-0.0293468	-1.21371	-0.0280219	0.882969	-0.411886	0.493723	-1.73801	0.519249	-0.558461	0.200766	0.745223	0.0226969	0.713084	-1.52497
IAA	0.405433	0.146872	-0.331964	0	-0.360016	-0.0850857	-0.435494	0.442715	-0.548156	0	-0.281465	-0.558273	-1.47716e-06	0.0360921	0	0.507235	-0.719406	-0.21243	0.279233	0.805684	0.0751238	0.0115011	-0.0678554	0.284295	0	-0.984532	-0.295925	0.0689461	0.0552674	0.108954	0.69948	-0.0835449	0.138088	1.38205	0.0860757	0.0274969	-0.0197807	-0.00503282	0.036581	-0.139404	0.93187	-0.233783	0.0250354	-0.648497	0.091136	0.0974864	-0.0234282	-0.182572	0.405261
GA3	0.277316	0.277171	-0.612024	0	-0.792389	0.126303	-0.421834	-0.56672	-0.532308	0.03632	0.189266	-0.621562	-1.52752e-06	0.11616	0	0.996595	-0.84042	0.0569391	0.861014	1.04269	0.138379	-0.0420988	-0.165253	0.559583	0	1.06345	-0.348091	-0.0146339	0.00965151	0.546025	1.06603	-0.06401	-0.225162	1.91529	0.0230245	0	-0.113709	-0.00520566	-0.296514	-0.185633	1.81084	1.23317	0.0557414	-0.665027	-0.0550193	0.396548	0.0159277	0.107441	1.04101
BAP	-0.551385	-0.00695141	-0.967856	0	-0.937751	-0.121824	-1.06925	-1.02132	-1.19336	0.0209839	-1.11103	-0.929995	-1.6093e-06	-0.0419463	0	-1.28876	-1.28773	-0.430643	-1.23919	-0.882893	0	-0.00220361	-0.649935	-1.19174	0	-1.88048	-0.757138	-0.491176	0.042193	-0.255868	-0.687567	-0.280587	-0.962238	0.566862	0	0	-1.33475	-0.0309922	-0.409428	-0.388605	-1.57665	-1.19652	-0.831803	-1.19162	-0.0745689	-0.231493	-0.0234282	-0.68894	-1.09663
ABA	0.162044	0.0732204	-0.719335	0	-0.437516	0.0738158	-0.562221	-0.544254	-0.7151	0	0.414204	-0.608172	-7.91796e-07	-0.064352	0.0864908	1.11497	0.478292	-0.132228	0.229938	0.623425	0	0.0560468	-0.578127	-0.419129	0	-1.58636	-0.480942	-0.0758498	0.0214154	0.320198	0.832859	-0.180601	-0.687037	1.31218	0.0258107	0	-0.706743	-0.0309922	0.0633033	0.170555	0.300509	-0.623291	-0.302565	-0.816877	-0.0745689	0.241432	-0.0234282	-0.159462	1.10293
[truncated: 6 more columns]

## Sheet: Biotic stress
	StSCL01	StSCL04	StSCL06	StSCL07	StSCL09	StSCL10	StSCL11	StSCL13	StSCL14	StSCL15	StSCL16	StSCL17	StSCL19	StSCL20	StSCL21	StSCL22	StSCL23	StSCL24	StSCL25	StSCL27	StSCL28	StSCL29	StSCL30	StSCL32	StSCL34	StSCL35	StSCL36	StSCL37	StSCL38	StSCL40	StSCL42	StSCL43	StSCL44	StSCL46	StSCL47	StSCL48	StSCL50	StSCL51	StSCL52	StSCL53	StSCL54	StSCL55	StSCL57	StSCL58	StSCL59	StSCL60	StSCL61	StSCL63	StSCL65
P. infestans	-0.00161258	-0.017332	-0.0879765	-0.0623157	-0.658431	-0.028211	-0.364589	0.137765	0.454921	0	0.571185	-0.220262	-0.0951067	0.0790069	0.019246	-0.441774	0.803717	0.10421	-0.116707	-0.795901	-0.0168107	0.00844772	0.00897172	0.00608935	0	-0.762303	-0.00951671	-0.220124	-0.00408666	-0.288942	-0.634272	0.075461	0.28122	-0.251881	-0.195626	0.0191377	-0.419427	0	-0.0806373	-0.239822	-1.01362	0.621612	-0.305042	-0.703145	0.0304027	-0.490644	0	-0.232818	0.526804
BABA	-0.0854725	-0.017332	-0.310533	-0.0758811	-1.13348	-0.0436188	-0.947727	-0.591654	-0.738451	0.0659563	1.43127	-0.53215	-0.0576954	-0.0135621	0	-0.740957	-0.87418	-0.0268988	0.358829	1.40247	-0.0680481	-0.021133	-0.0279043	-0.406877	0	-1.24095	-0.00951671	-0.226695	0.0186478	-0.0831549	0.588664	0.0530221	0.000359881	0.935835	-0.18777	0	0.847301	0	-0.408091	0.257674	0.841435	1.14621	-0.516147	-0.839507	0	-0.224637	0.0124475	0.61594	0.786205
BTH	0.0739309	-0.017332	-0.0332226	-0.0386705	-0.767727	0.0402838	-0.535155	0.623185	0.29451	0	-0.725879	0.230625	0.0471931	0.0563015	0	0.698196	0.133667	0.193085	0.91096	-1.18727	0.00179557	-0.0287993	0.0165227	0.847093	0	0.52683	0.0468934	-0.156037	0.221942	0.148671	-0.460341	0.122191	0.277651	-0.485778	-0.21259	0	-0.489255	0	-0.379572	-0.222074	-1.73078	-0.277724	0.876027	-0.411401	0	0.381779	0.0182706	-0.132663	0.476382
[truncated: 6 more columns]
