# Supplementary material
Source: Research Square preprint supplement (doi:10.21203/rs.3.rs-8953685/v1)
Supplement: Supplementary file 9 [file d356cf3b0e2bf94bb1c8fb05.xlsx]

## Sheet: Sheet1
Gene Name	Gene ID	aa Number	KDA	PI	Instability index	Location
StSCL-1	PGSC0003DMT400003954	467	52.64	6.09	39.34	nucl/chlo
StSCL-2	PGSC0003DMT400005479	245	28.59	5.28	42.62	chlo/nucl
StSCL-3	PGSC0003DMT400015696	535	59.56	5.83	42.75	nucl/cyto
StSCL-4	PGSC0003DMT400005481	487	55.14	5.38	49.42	cyto/nucl
StSCL-5	PGSC0003DMT400007878	197	22.33	5.28	66.39	nucl/chlo
StSCL-6	PGSC0003DMT400007879	679	75.42	5.8	62	chlo/nucl
StSCL-7	PGSC0003DMT400010158	494	56.29	5.1	50.09	nucl/cyto
StSCL-8	PGSC0003DMT400011838	447	50.35	6.3	51.34	nucl/nucl_plas
StSCL-9	PGSC0003DMT400011839	468	52.56	6.09	53.18	cyto/nucl
StSCL-10	PGSC0003DMT400011954	512	58.92	5.31	44.83	nucl/cyto
StSCL-11	PGSC0003DMT400012104	700	76.45	5.92	63.85	nucl/chlo
StSCL-12	PGSC0003DMT400015695	535	59.56	5.83	42.75	nucl/cyto
StSCL-13	PGSC0003DMT400005480	487	55.14	5.38	49.42	cyto/nucl
StSCL-14	PGSC0003DMT400016258	728	82.1	5.45	50.44	cyto/nucl
StSCL-15	PGSC0003DMT400018792	584	66.25	5.25	44.88	nucl/cyto
StSCL-16	PGSC0003DMT400021748	559	61.72	5.61	42.91	nucl/chlo
StSCL-17	PGSC0003DMT400022996	761	85.91	5.72	43.33	chlo/mito
StSCL-18	PGSC0003DMT400022997	761	85.91	5.72	43.33	chlo/mito
StSCL-19	PGSC0003DMT400023345	584	66.03	5.09	41.43	nucl/cyto
StSCL-20	PGSC0003DMT400023346	395	44.74	5.97	40.23	cyto/chlo
StSCL-21	PGSC0003DMT400023877	412	46.99	5.78	36.83	cyto/nucl
StSCL-22	PGSC0003DMT400026240	654	71.94	6.18	65.73	nucl/chlo
StSCL-23	PGSC0003DMT400030652	411	45.62	5.14	56.28	cyto/nucl
StSCL-24	PGSC0003DMT400031475	496	55.17	5.07	44.66	nucl/cyto
StSCL-25	PGSC0003DMT400033037	545	60.23	5.58	42.46	chlo/nucl
StSCL-26	PGSC0003DMT400034763	534	59.6	5.43	48.21	nucl/chlo
StSCL-27	PGSC0003DMT400034764	534	59.61	5.43	48.21	nucl/chlo
StSCL-28	PGSC0003DMT400036577	130	15.23	6.33	27.51	mito/chlo
StSCL-29	PGSC0003DMT400037814	344	37.49	4.88	37.36	cysk/cyto
StSCL-30	PGSC0003DMT400037884	419	47.85	5.39	50.27	nucl/cyto
StSCL-31	PGSC0003DMT400038572	488	53.3	5	51.18	nucl/cyto_nucl
StSCL-32	PGSC0003DMT400038573	611	66.71	4.83	52.94	nucl/chlo
StSCL-33	PGSC0003DMT400038574	611	66.71	4.83	52.94	nucl/chlo
StSCL-34	PGSC0003DMT400039455	533	59.35	6.4	50.67	cyto/extr
StSCL-35	PGSC0003DMT400040589	588	64.43	5	45.98	nucl/cyto
StSCL-36	PGSC0003DMT400043358	826	90.15	5.9	51.93	nucl/cyto
StSCL-37	PGSC0003DMT400049420	664	75.62	6.36	47.38	nucl/cyto
StSCL-38	PGSC0003DMT400049445	421	46.75	4.49	47.68	cyto/nucl
StSCL-39	PGSC0003DMT400049447	201	23.02	5.4	38.17	cyto/chlo
StSCL-40	PGSC0003DMT400049448	510	57.31	5.34	42.71	nucl/cyto
StSCL-41	PGSC0003DMT400049492	582	64.83	6.18	44.78	nucl/cyto
StSCL-42	PGSC0003DMT400049493	582	64.83	6.18	44.78	nucl/cyto
StSCL-43	PGSC0003DMT400052191	375	41.89	6.32	48.6	cyto/ cyto_E.R.
StSCL-44	PGSC0003DMT400055239	455	51.28	5.78	45.28	nucl/cyto
StSCL-45	PGSC0003DMT400056120	559	62.54	5.54	46.3	cyto/nucl
StSCL-46	PGSC0003DMT400056121	559	62.54	5.54	46.3	cyto/nucl
StSCL-47	PGSC0003DMT400056229	481	54.37	6.35	45.47	cyto/nucl
StSCL-48	PGSC0003DMT400056232	414	46.81	5.98	32.54	cyto/nucl
StSCL-49	PGSC0003DMT400057111	537	60.14	5.23	54.77	nucl/chlo
StSCL-50	PGSC0003DMT400057112	537	60.14	5.23	54.77	nucl/chlo
StSCL-51	PGSC0003DMT400057265	431	48.91	8.42	47.01	nucl/cyto
StSCL-52	PGSC0003DMT400058477	472	53.22	6.08	52.26	cyto/nucl
StSCL-53	PGSC0003DMT400060553	524	58.68	6.41	54.18	nucl/chlo
StSCL-54	PGSC0003DMT400063769	646	73.11	6.51	49.64	pero/chlo
StSCL-55	PGSC0003DMT400063944	559	62.8	4.99	50.34	nucl/chlo
StSCL-56	PGSC0003DMT400063945	559	62.8	4.99	50.34	nucl/chlo
StSCL-57	PGSC0003DMT400064187	438	49.39	5.5	36.75	chlo/cysk
StSCL-58	PGSC0003DMT400066799	768	83.21	5.68	56.11	nucl/cyto
StSCL-59	PGSC0003DMT400067360	427	48.27	5.27	44.78	nucl/cyto
StSCL-60	PGSC0003DMT400068507	508	58.73	5.16	55.71	nucl/chlo
StSCL-61	PGSC0003DMT400069845	553	63.8	5.63	48.47	nucl/cyto
StSCL-62	PGSC0003DMT400069949	747	84.27	5.87	43.23	nucl/cyto
StSCL-63	PGSC0003DMT400069950	747	84.27	5.87	43.23	nucl/cyto
StSCL-64	PGSC0003DMT400076931	485	53.11	5.38	43.54	chlo/chlo_mito
StSCL-65	PGSC0003DMT400076932	606	66.8	5.83	52.74	nucl/cyto
StSCL-66	PGSC0003DMT400077972	752	85.16	5.49	42.75	cyto/chlo
StSCL-67	PGSC0003DMT400077973	61	6.95	7.92	30.63	cyto/mito
StSCL-68	PGSC0003DMT400078286	667	75.18	5.81	46.67	nucl/cyto
StSCL-69	PGSC0003DMT400087504	486	54.53	5.95	45.06	E.R./golg
StSCL-70	PGSC0003DMT400088400	525	59.67	5.76	40.49	chlo/nucl
StSCL-71	PGSC0003DMT400089692	542	61	5.72	44.61	nucl/chlo
