# Supplementary material
Source: Research Square preprint supplement (doi:10.21203/rs.3.rs-8953685/v1)

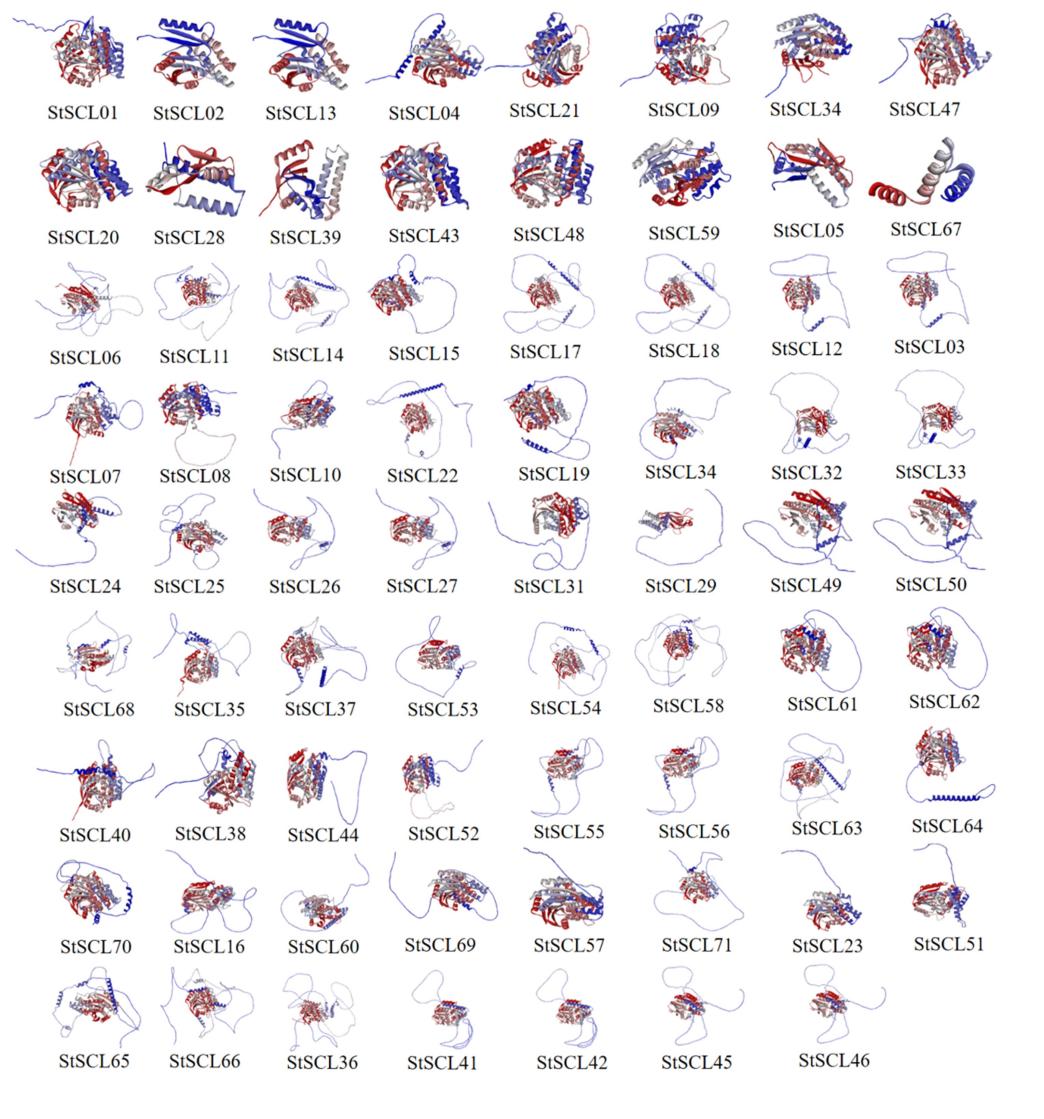


Figure S1. Predictive 3D structures of StSCLs

Supplement: Supplementary file 3 [file 49db0b87da31066751455e46.docx]

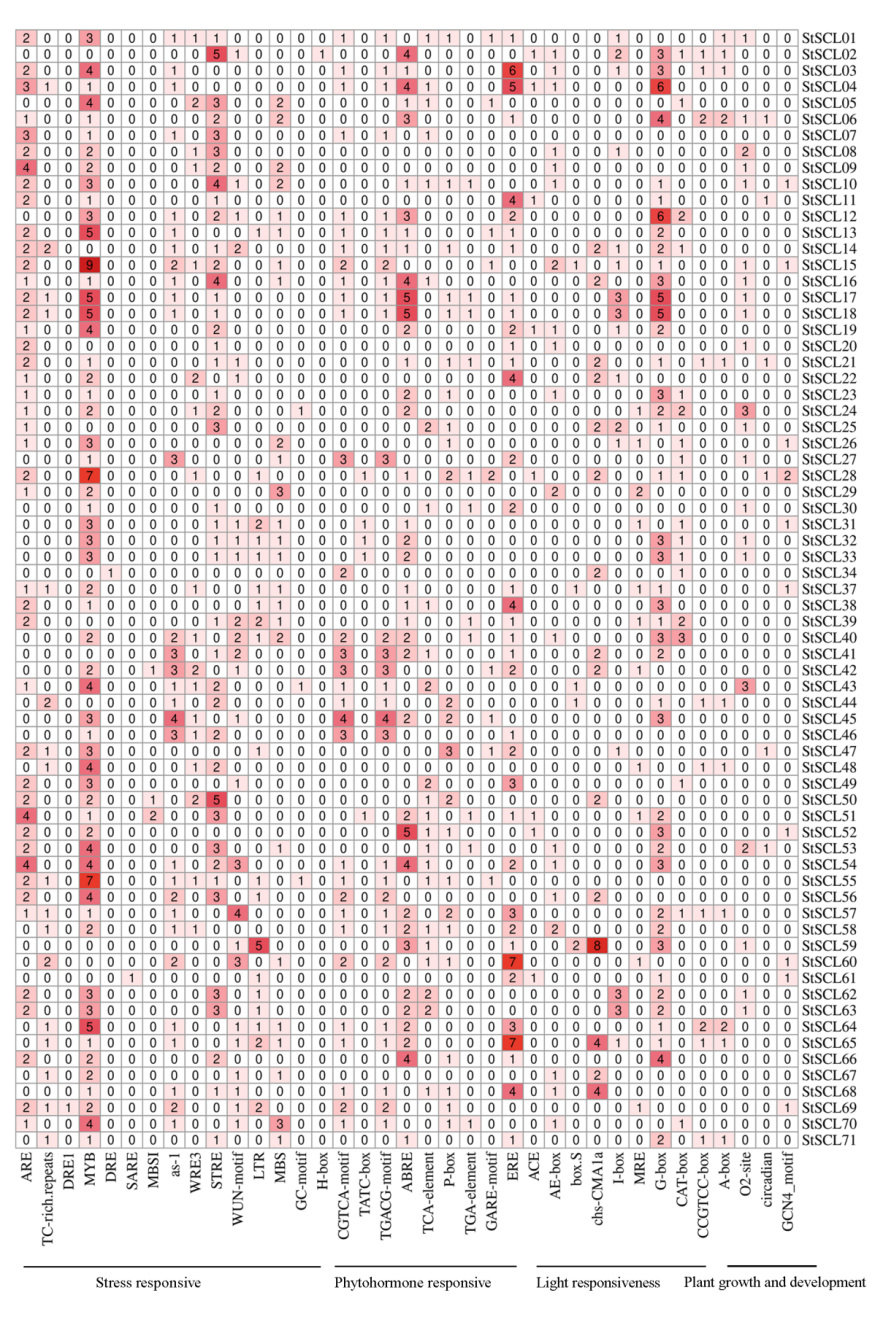


Figure S2. *Cis*-acting elements on the promoters of *StSCLs*

Supplement: Supplementary file 10 [file f9d9fbfd3d3d2a19dc1a1315.docx]
